# Supplementary material for: Screening and Identification of Prognostic Tumor-Infiltrating Immune Cells and Genes of Endometrioid Endometrial Adenocarcinoma: Based on The Cancer Genome Atlas Database and Bioinformatics
Source: Front Oncol. 2020 Dec 1;10:554214. doi: 10.3389/fonc.2020.554214 (PMC7737471; doi:10.3389/fonc.2020.554214)
Supplement: Supplementary file 3 [file Table_3.xlsx]

## Sheet: Table S3
Table S3. The overall survival and risk scores of EEA samples
Sample ID	Survival Time	Overall Survival	Risk Score	Risk Level
TCGA-AX-A06L-01A-11R-A118-07	4.05479	0	0.230229	low
TCGA-BG-A0VW-01A-11R-A118-07	0.361644	0	3.95842	high
TCGA-A5-A0GQ-01A-11R-A118-07	3.19726	0	0.17265	low
TCGA-EY-A215-01A-11R-A14M-07	1.07123	0	2.11053	high
TCGA-A5-A0VQ-01A-11R-A104-07	0.484932	0	0.0559263	low
TCGA-B5-A11E-01A-11R-A10J-07	0.726027	0	0.423677	low
TCGA-BG-A0MC-01A-21R-A040-07	2.26575	0	1.88453	high
TCGA-AX-A2IN-01A-12R-A180-07	2.59452	1	10.2398	high
TCGA-DF-A2L0-01A-11R-A180-07	2.1589	1	1.04294	low
TCGA-AX-A060-01A-11R-A00V-07	2.94521	0	0.220003	low
TCGA-B5-A0K7-01A-11R-A104-07	1.01918	0	0.631888	low
TCGA-AP-A0LF-01A-11R-A118-07	7.79452	0	0.377957	low
TCGA-5S-A9Q8-01A-11R-A40A-07	0.090411	0	0.860324	low
TCGA-BG-A0MO-01A-11R-A040-07	2.79726	0	0.804423	low
TCGA-BG-A186-01A-11R-A12I-07	0.630137	0	1.86353	high
TCGA-B5-A0JX-01A-21R-A14M-07	3.72603	0	0.533014	low
TCGA-AP-A1DV-01A-21R-A137-07	0.558904	0	3.0293	high
TCGA-EO-A1Y7-01A-11R-A157-07	0.665753	0	0.13549	low
TCGA-BS-A0UM-01A-11R-A104-07	6.00274	0	0.523864	low
TCGA-A5-A2K7-01A-11R-A180-07	0.430137	0	0.0200222	low
TCGA-BK-A6W3-01A-12R-A34R-07	0.235616	0	0.763564	low
TCGA-EO-A3AU-01A-21R-A19W-07	1.6137	0	2.11209	high
TCGA-DF-A2KN-01A-11R-A180-07	0.183562	0	0.480989	low
TCGA-BG-A0MS-01A-11R-A104-07	1.51507	0	0.915409	low
TCGA-FI-A2F4-01A-11R-A17B-07	2.4137	0	2.21051	high
TCGA-BS-A0TI-01A-11R-A104-07	3.95342	0	11.0028	high
TCGA-AX-A2HD-01A-21R-A17B-07	3.37534	0	8.30486	high
TCGA-E6-A2P9-01A-11R-A19W-07	0.556164	0	0.533664	low
TCGA-PG-A917-01A-31R-A37O-07	0.580822	0	1.43743	high
TCGA-AP-A1DK-01A-11R-A137-07	4.52055	0	1.56508	high
TCGA-AP-A1DM-01A-21R-A137-07	3.6411	0	3.25131	high
TCGA-EO-A3B0-01A-12R-A19W-07	1.10685	0	1.95306	high
TCGA-D1-A16V-01A-11R-A12I-07	0.117808	0	1.30597	high
TCGA-BK-A13C-01A-11R-A118-07	0.553425	0	2.97812	high
TCGA-BS-A0TC-01A-11R-A104-07	6.19178	0	2.44589	high
TCGA-BG-A0MA-01A-11R-A17B-07	0.893151	1	1.40039	high
TCGA-BG-A18A-01A-21R-A12I-07	0.690411	0	0.586449	low
TCGA-EY-A548-01A-11R-A27V-07	0.178082	0	0.980042	low
TCGA-BG-A0MH-01A-11R-A118-07	3.67397	0	1.04781	low
TCGA-A5-A0GX-01A-11R-A040-07	2.53425	0	0.130354	low
TCGA-AX-A0J1-01A-11R-A040-07	5.49041	0	1.53625	high
TCGA-B5-A11U-01A-11R-A118-07	0.742466	0	8.34792	high
TCGA-QS-A5YR-01A-31R-A31O-07	0.460274	0	17.0766	high
TCGA-D1-A102-01A-11R-A10J-07	0.117808	0	0.264245	low
TCGA-EO-A3AS-01A-11R-A19W-07	2.86575	0	4.79658	high
TCGA-D1-A160-01A-11R-A118-07	0.306849	0	1.02036	low
TCGA-A5-A0VP-01A-21R-A104-07	2.54247	0	1.31809	high
TCGA-A5-A3LO-01A-11R-A22K-07	0.610959	0	14.2413	high
TCGA-B5-A11Y-01A-21R-A10J-07	0.863014	0	0.180579	low
TCGA-BG-A0VX-01A-11R-A118-07	1.34247	0	1.2751	high
TCGA-DI-A1NO-01A-31R-A157-07	0.780822	1	12.2741	high
TCGA-AX-A2HJ-01A-11R-A17B-07	2.27671	0	3.30308	high
TCGA-FI-A2CX-01A-11R-A17B-07	3.33425	0	1.28258	high
TCGA-D1-A0ZS-01A-11R-A118-07	0.405479	0	1.46699	high
TCGA-D1-A16R-01A-11R-A12I-07	0.0575342	0	0.116394	low
TCGA-D1-A0ZO-01A-11R-A118-07	0.189041	0	0.218221	low
TCGA-D1-A174-01A-11R-A12I-07	0.887671	0	0.132159	low
TCGA-EO-A3AV-01A-12R-A19W-07	1.56986	0	0.255366	low
TCGA-AJ-A3NE-01A-11R-A22K-07	0.213699	0	9.09909	high
TCGA-AX-A05S-01A-11R-A00V-07	1.13151	1	3.72135	high
TCGA-E6-A1LX-01A-11R-A14D-07	1.94795	0	0.209279	low
TCGA-A5-A0GN-01A-11R-A040-07	4.04658	0	0.101022	low
TCGA-B5-A11H-01A-11R-A118-07	6.34795	0	2.87065	high
TCGA-D1-A16N-01A-11R-A12I-07	1.75342	0	1.08085	low
TCGA-B5-A11R-01A-11R-A118-07	2.29315	0	3.96467	high
TCGA-5B-A90C-01A-11R-A37O-07	2.41918	0	6.45985	high
TCGA-D1-A1NS-01A-11R-A14D-07	0.117808	0	1.89653	high
TCGA-D1-A16Q-01A-12R-A12I-07	0.605479	0	0.456997	low
TCGA-B5-A11W-01A-12R-A118-07	0.928767	0	12.4665	high
TCGA-A5-AB3J-01A-11R-A40A-07	0.687671	0	1.062	low
TCGA-BG-A0VZ-01A-11R-A109-07	2.37808	0	0.349206	low
TCGA-B5-A0JS-01A-11R-A104-07	3.4	0	0.521596	low
TCGA-A5-A0GJ-01A-11R-A040-07	3.96438	0	0.168383	low
TCGA-BG-A0RY-01A-11R-A104-07	0.350685	0	0.472717	low
TCGA-H5-A2HR-01A-11R-A180-07	0.145205	0	1.52771	high
TCGA-B5-A0JZ-01A-11R-A040-07	1.88767	0	0.218393	low
TCGA-AX-A1CE-01A-11R-A137-07	1.67123	0	6.00951	high
TCGA-BS-A0VI-01A-11R-A14D-07	4.55068	0	2.42769	high
TCGA-PG-A916-01A-11R-A37O-07	0.936986	0	7.25306	high
TCGA-EY-A1GC-01A-11R-A13S-07	0.378082	0	0.581164	low
TCGA-B5-A0JR-01A-13R-A466-07	4.0137	0	0.24844	low
TCGA-AJ-A8CW-01A-11R-A37O-07	0.0109589	0	1.68177	high
TCGA-D1-A17A-01A-11R-A12I-07	0.0520548	0	4.55308	high
TCGA-D1-A16E-01A-22R-A12I-07	2.49041	0	0.547493	low
TCGA-B5-A11I-01A-11R-A10J-07	5.58356	0	2.18239	high
TCGA-AX-A06D-01A-11R-A118-07	1.02192	1	8.07755	high
TCGA-AX-A0IZ-01A-11R-A118-07	3.65205	0	0.361896	low
TCGA-D1-A16X-01A-11R-A12I-07	0.30411	0	0.207612	low
TCGA-SL-A6J9-01A-11R-A31O-07	0.00547945	0	0.592702	low
TCGA-D1-A169-01A-11R-A12I-07	2.47945	0	0.386804	low
TCGA-AP-A0LM-01A-11R-A118-07	2.26027	0	0.8592	low
TCGA-BS-A0TJ-01A-11R-A104-07	4.14795	0	8.13663	high
TCGA-D1-A16D-01A-11R-A12I-07	2.48767	0	0.882132	low
TCGA-EY-A1GW-01A-22R-A13S-07	0.712329	0	1.16443	high
TCGA-D1-A1NY-01A-11R-A16F-07	1.08493	0	1.23963	high
TCGA-D1-A17R-01A-11R-A12I-07	0.928767	1	10.959	high
TCGA-D1-A16J-01A-11R-A12I-07	2.03288	0	1.15188	high
TCGA-D1-A2G6-01A-11R-A17B-07	0.706849	1	5.96355	high
TCGA-AJ-A23O-01A-11R-A157-07	0.164384	0	0.453061	low
TCGA-BG-A0MU-01A-11R-A104-07	0.635616	0	0.180922	low
TCGA-AP-A0LS-01A-11R-A14D-07	4.56986	0	1.12729	high
TCGA-BS-A0TE-01A-11R-A104-07	0.4	1	2.56721	high
TCGA-AP-A0LP-01A-12R-A104-07	5.13699	0	1.66749	high
TCGA-B5-A0K4-01A-11R-A040-07	1.27671	0	1.35903	high
TCGA-AJ-A2QL-01A-11R-A18M-07	0.134247	0	37.5402	high
TCGA-BS-A0TA-01A-11R-A104-07	1.95616	0	0.234304	low
TCGA-B5-A0K9-01A-21R-A104-07	0.457534	0	0.171903	low
TCGA-BS-A0UJ-01A-12R-A104-07	0.0739726	0	0.0997465	low
TCGA-D1-A101-01A-12R-A10J-07	0.145205	0	0.138343	low
TCGA-B5-A11N-01A-11R-A118-07	3.14247	0	0.642719	low
TCGA-A5-A0GE-01A-11R-A16W-07	7.44384	0	0.0691749	low
TCGA-BK-A139-02A-11R-A27V-07	0.654795	0	0.0406835	low
TCGA-BG-A18B-01A-11R-A12I-07	0.424658	0	0.0798517	low
TCGA-AP-A0LL-01A-12R-A104-07	5.86575	0	0.205011	low
TCGA-BS-A0UL-01A-11R-A109-07	0.0986301	0	4.41521	high
TCGA-B5-A1MX-01A-11R-A144-07	0.479452	0	3.05268	high
TCGA-AJ-A3BI-01A-11R-A213-07	0.186301	0	0.0789448	low
TCGA-BG-A0VV-01A-21R-A118-07	0.745205	0	3.28882	high
TCGA-AP-A1E3-01A-11R-A137-07	1.43288	0	0.221194	low
TCGA-AJ-A5DV-01A-11R-A27V-07	0.405479	0	8.00873	high
TCGA-AX-A1CJ-01A-11R-A137-07	4.50959	0	1.76872	high
TCGA-BS-A0T9-01A-11R-A12I-07	3.91233	1	9.99721	high
TCGA-AJ-A2QK-01A-11R-A18M-07	0.0328767	0	0.963645	low
TCGA-AX-A06H-01A-11R-A118-07	2.28219	0	0.274703	low
TCGA-B5-A0K0-01A-11R-A16W-07	1.86027	0	2.97507	high
TCGA-AP-A0LN-01A-11R-A040-07	5.46027	0	0.44844	low
TCGA-BS-A0UA-01A-11R-A118-07	6.9589	0	1.06545	low
TCGA-D1-A0ZN-01A-11R-A118-07	1.40274	0	6.01576	high
TCGA-B5-A3FD-01A-11R-A19W-07	2.18082	0	1.8901	high
TCGA-AX-A05Z-01A-11R-A00V-07	3.87123	0	0.571132	low
TCGA-A5-A0VO-01A-21R-A109-07	0.350685	0	1.2288	high
TCGA-DF-A2KS-01A-11R-A18M-07	5.99452	0	3.23837	high
TCGA-B5-A0K3-01A-11R-A040-07	1.91781	0	1.68567	high
TCGA-D1-A0ZR-01A-21R-A10J-07	0.0465753	0	0.545325	low
TCGA-BK-A0CB-01A-32R-A104-07	0.517808	0	1.04766	low
TCGA-A5-A0GA-01A-11R-A040-07	1.48767	1	4.32663	high
TCGA-D1-A162-01A-11R-A118-07	2.67397	0	5.25905	high
TCGA-EY-A1GK-01A-11R-A13S-07	1.38082	0	0.0277578	low
TCGA-AX-A06F-01A-11R-A00V-07	4.25753	0	1.41689	high
TCGA-SJ-A6ZI-01A-12R-A34R-07	0.350685	0	0.370347	low
TCGA-EC-A24G-01A-11R-A16F-07	0.128767	0	1.91653	high
TCGA-B5-A11L-01B-21R-A13S-07	3.82466	0	3.02554	high
TCGA-BK-A0C9-01A-11R-A00V-07	0.791781	0	2.11095	high
TCGA-AP-A05P-01A-11R-A16W-07	0.712329	0	0.391796	low
TCGA-AX-A3GB-01A-11R-A22K-07	1.20548	0	0.107456	low
TCGA-AX-A0J0-01A-11R-A109-07	3.34247	0	6.98834	high
TCGA-A5-A0R9-01A-11R-A104-07	0.805479	0	0.311906	low
TCGA-A5-A0R7-01A-31R-A16W-07	0.109589	0	0.529372	low
TCGA-B5-A0K6-01A-11R-A040-07	1.14521	0	0.18744	low
TCGA-D1-A17C-01A-11R-A12I-07	0.00273973	0	0.209198	low
TCGA-AJ-A8CT-01A-11R-A37O-07	0.224658	0	0.929192	low
TCGA-AX-A3FX-01A-11R-A22K-07	0.0109589	0	1.94453	high
TCGA-AX-A2H8-01A-11R-A17B-07	5.09863	0	20.4652	high
TCGA-AJ-A2QO-01A-11R-A32Y-07	0.252055	0	37.0406	high
TCGA-D1-A17F-01A-11R-A12I-07	0.106849	0	0.227189	low
TCGA-BG-A0LX-01A-11R-A16W-07	0.693151	0	0.907762	low
TCGA-D1-A17M-01A-21R-A12I-07	0.852055	0	6.58677	high
TCGA-BG-A0MI-01A-11R-A040-07	1.95616	1	26.1537	high
TCGA-B5-A3F9-01A-21R-A22K-07	8.94247	0	2.26627	high
TCGA-EY-A5W2-01A-11R-A31O-07	0.441096	0	0.569658	low
TCGA-B5-A11G-01A-13R-A118-07	8.43014	0	0.0535552	low
TCGA-AP-A05N-01A-11R-A00V-07	0.654795	0	2.2688	high
TCGA-AJ-A3BK-01A-11R-A19W-07	0.139726	0	1.69652	high
TCGA-EO-A22R-01A-11R-A18M-07	2.66301	0	0.237935	low
TCGA-A5-A0GD-01A-11R-A16W-07	0.268493	0	1.35702	high
TCGA-BG-A0M2-01A-11R-A104-07	0.868493	0	1.66989	high
TCGA-D1-A3DH-01A-11R-A19W-07	0.342466	0	10.5305	high
TCGA-D1-A16F-01A-11R-A12I-07	0.219178	0	1.27031	high
TCGA-A5-A0GI-01A-11R-A040-07	4.79452	0	0.0875849	low
TCGA-A5-A0GB-01A-11R-A040-07	0.753425	0	0.133293	low
TCGA-A5-A0GR-01A-11R-A118-07	2.13699	0	0.344477	low
TCGA-AX-A063-01A-11R-A00V-07	5.54795	0	0.292101	low
TCGA-BS-A0UV-01A-11R-A16W-07	0.408219	0	6.58326	high
TCGA-EC-A1QX-01A-31R-A16F-07	0.180822	0	0.320826	low
TCGA-BG-A0W1-01A-12R-A109-07	0.334247	0	1.05217	low
TCGA-A5-A0GG-01A-11R-A118-07	6.89589	0	0.567866	low
TCGA-D1-A17U-01A-21R-A12I-07	1.08493	0	3.08529	high
TCGA-E6-A1M0-01A-11R-A144-07	1.1726	0	0.728548	low
TCGA-A5-A1OJ-01A-11R-A14D-07	0.8	0	0.567962	low
TCGA-BG-A0M8-01A-12R-A104-07	1.89041	0	0.697909	low
TCGA-FI-A2D0-01A-11R-A17B-07	2.83288	0	0.129168	low
TCGA-D1-A15W-01A-11R-A118-07	2.50685	0	0.860082	low
TCGA-AJ-A3OJ-01A-11R-A22K-07	0.161644	0	3.99342	high
TCGA-AX-A3G1-01A-11R-A22K-07	1.70959	1	0.768044	low
TCGA-BG-A0VT-01A-11R-A10J-07	0.613699	0	0.350829	low
TCGA-AJ-A8CV-01A-11R-A37O-07	0.194521	0	0.436558	low
TCGA-QS-A5YQ-01A-11R-A31O-07	0.350685	0	2.71539	high
TCGA-B5-A11O-01A-11R-A118-07	2.85479	0	0.848763	low
TCGA-D1-A1O5-01A-11R-A14D-07	1.03288	0	1.16402	high
TCGA-B5-A3FA-01A-11R-A19W-07	7.0274	0	7.56849	high
TCGA-A5-A0R8-01A-11R-A104-07	0.345205	0	0.83165	low
TCGA-AX-A1CK-01A-11R-A137-07	5.62466	0	3.11195	high
TCGA-AX-A1CN-01A-11R-A137-07	2.09315	0	0.840471	low
TCGA-BS-A0TD-01A-11R-A104-07	5.48767	0	1.47912	high
TCGA-BG-A0M7-01A-11R-A040-07	1.91233	0	0.76217	low
TCGA-B5-A0K2-01A-12R-A104-07	1.87123	0	5.19183	high
TCGA-AP-A05O-01A-12R-A118-07	1.05205	0	0.493903	low
TCGA-BG-A220-01A-11R-A157-07	0.605479	0	0.393434	low
TCGA-BS-A0V7-01A-21R-A118-07	3.91507	0	0.398798	low
TCGA-B5-A5OC-01A-21R-A27V-07	2.30411	0	0.0926087	low
TCGA-D1-A17D-01A-12R-A12I-07	0.438356	0	0.197449	low
TCGA-D1-A165-01A-11R-A12I-07	0.0547945	0	2.2846	high
TCGA-A5-A0GM-01A-11R-A040-07	3.96712	0	3.74453	high
TCGA-AX-A1CF-01A-11R-A137-07	6.40274	0	0.688029	low
TCGA-B5-A0KB-01B-11R-A14D-07	0.342466	0	0.0010606	low
TCGA-BS-A0TG-01A-32R-A16W-07	5.57534	0	0.585109	low
TCGA-D1-A1O8-01A-11R-A14D-07	0.328767	1	36.3474	high
TCGA-EO-A22X-01A-11R-A180-07	2.69041	0	2.9418	high
TCGA-BG-A2L7-01A-11R-A18M-07	0.484932	0	1.26864	high
TCGA-AX-A06B-01A-11R-A00V-07	4.49315	0	1.32401	high
TCGA-D1-A161-01A-11R-A118-07	2.44384	0	0.165204	low
TCGA-AP-A0LJ-01A-11R-A040-07	3.89315	0	0.592162	low
TCGA-EY-A1GP-01A-11R-A13S-07	0.953425	0	0.135362	low
TCGA-EO-A3AY-01A-12R-A19W-07	1.07397	0	0.322368	low
TCGA-D1-A17T-01A-11R-A12I-07	0.194521	0	3.22571	high
TCGA-AP-A1DH-01A-31R-A137-07	4.97534	0	0.228046	low
TCGA-BG-A3EW-01A-11R-A22K-07	0.0136986	0	0.00667943	low
TCGA-A5-A0G5-01A-11R-A040-07	2.16438	0	0.395635	low
TCGA-B5-A1MV-01A-31R-A14D-07	1.0411	0	7.92007	high
TCGA-DF-A2KY-01A-21R-A213-07	0.909589	0	3.30935	high
TCGA-AP-A056-01A-11R-A00V-07	5.55068	0	0.284091	low
TCGA-D1-A17K-01A-11R-A12I-07	1.17534	0	4.118	high
TCGA-EY-A1GF-01A-11R-A13S-07	1.45753	0	2.15138	high
TCGA-D1-A163-01A-11R-A12I-07	2.56986	0	0.0238575	low
TCGA-BS-A0V6-01A-11R-A118-07	4.52055	0	3.58925	high
TCGA-DF-A2KU-01A-11R-A180-07	5.43288	0	3.96222	high
TCGA-A5-A0RA-01A-21R-A104-07	1.52329	0	7.73511	high
TCGA-DF-A2KV-01A-11R-A180-07	2.56438	0	1.10129	low
TCGA-FI-A2D6-01A-11R-A17B-07	0.747945	0	1.34869	high
TCGA-D1-A103-01A-11R-A10J-07	1.31507	0	2.04572	high
TCGA-AP-A1E0-01A-11R-A137-07	1.89315	0	2.08896	high
TCGA-B5-A0JV-01A-11R-A104-07	3.08219	0	6.76908	high
TCGA-D1-A17N-01A-11R-A12I-07	0.126027	0	0.884777	low
TCGA-D1-A17L-01A-11R-A12I-07	1.25753	0	1.94697	high
TCGA-AX-A05W-01A-21R-A466-07	5.69589	0	5.6518	high
TCGA-D1-A17S-01A-11R-A12I-07	0.893151	0	11.868	high
TCGA-B5-A3FH-01A-11R-A19W-07	0.539726	0	4.2488	high
TCGA-D1-A0ZV-01A-11R-A10J-07	0.958904	0	3.10088	high
TCGA-EY-A1GR-01A-11R-A13S-07	0.942466	0	1.15524	high
TCGA-BS-A0U7-01A-21R-A104-07	2.56164	1	1.55117	high
TCGA-A5-A2K5-01A-11R-A180-07	0.443836	0	0.906283	low
TCGA-AP-A1DR-01A-11R-A137-07	3.09863	0	0.0041742	low
TCGA-AX-A2HG-01A-11R-A17B-07	1.81096	0	0.0589998	low
TCGA-D1-A17B-01A-22R-A12I-07	0.583562	0	0.38355	low
TCGA-DF-A2KR-01A-11R-A180-07	5.10959	0	6.92354	high
TCGA-D1-A17H-01A-11R-A12I-07	1.24384	0	2.00639	high
TCGA-EY-A1GE-01A-11R-A13S-07	1.51233	0	1.56954	high
TCGA-EY-A214-01A-12R-A157-07	0.690411	0	1.82825	high
TCGA-AX-A06J-01A-11R-A00V-07	2.50137	0	1.07522	low
TCGA-B5-A1MR-01A-31R-A14D-07	15.5918	0	6.06204	high
