# Supplementary material for: Screening and Identification of Prognostic Tumor-Infiltrating Immune Cells and Genes of Endometrioid Endometrial Adenocarcinoma: Based on The Cancer Genome Atlas Database and Bioinformatics
Source: Front Oncol. 2020 Dec 1;10:554214. doi: 10.3389/fonc.2020.554214 (PMC7737471; doi:10.3389/fonc.2020.554214)
Supplement: Supplementary file 4 [file Table_4.xlsx]

## Sheet: Table S4
Table S4. Differentially expressed genes selected between low- and high-risk score groups
Gene Symbol	LogFC	P Value	FDR
AC099789.1	-2.54821	5.23789e-19	1.36238e-14
TKTL1	-3.95047	4.24228e-17	5.51709e-13
CRTAC1	-2.42421	7.84996e-15	6.80591e-11
SCGB1C1	-3.33922	1.09219e-14	7.10198e-11
LYPD2	-4.02502	1.07344e-13	4.82406e-10
KRT79	-2.97519	1.11282e-13	4.82406e-10
IGSF1	-2.81383	1.64052e-13	6.09571e-10
ALOX12	-1.83563	6.40277e-13	2.0817e-09
RPL23AP77	-2.77142	9.64783e-13	2.78822e-09
CLDN18	4.14606	1.09239e-12	2.8413e-09
AC129507.4	-2.50388	1.47795e-12	3.49469e-09
SCGB1C2	-3.18059	2.86491e-12	6.2097e-09
SERPIND1	3.35194	6.70748e-12	1.34201e-08
TFF2	3.36482	3.65727e-11	6.79469e-08
APOA2	4.44862	2.09169e-10	3.50723e-07
SPINK1	3.17397	2.15747e-10	3.50723e-07
CLDN16	-2.13943	3.40974e-10	5.2169e-07
IGLV9-49	2.7936	4.21841e-10	5.81553e-07
LHX9	-2.27724	4.39925e-10	5.81553e-07
CRLF1	-1.64157	4.47177e-10	5.81553e-07
LRRN3	-1.86317	4.7841e-10	5.83361e-07
RNA5SP202	-3.391	4.93423e-10	5.83361e-07
AHSG	3.00712	1.32053e-09	1.49335e-06
ERVW-1	-2.21596	1.96293e-09	2.12732e-06
AP005431.1	-1.63081	2.18221e-09	2.1972e-06
GFRA4	-3.12555	2.19636e-09	2.1972e-06
IGKV1D-43	-2.06733	3.62991e-09	3.49682e-06
CD177	2.57608	4.35432e-09	4.04485e-06
CYP26A1	2.32472	5.67921e-09	5.09367e-06
GAGE2A	-2.84316	7.24068e-09	6.27767e-06
APOB	3.17379	1.46379e-08	1.22817e-05
AL139327.1	-2.317	1.52686e-08	1.24105e-05
ANO2	2.03074	1.61002e-08	1.26288e-05
SIX3	-1.78146	1.65083e-08	1.26288e-05
GAPDHP53	-2.57645	1.76156e-08	1.30909e-05
AC138965.1	-2.155	1.91041e-08	1.38027e-05
DLL3	-2.06076	2.03442e-08	1.43015e-05
AC103724.4	-1.66619	2.66376e-08	1.82328e-05
ODAM	2.58953	3.37312e-08	2.24961e-05
CTSE	1.9475	3.56535e-08	2.31837e-05
RNA5SP162	-3.12274	4.01383e-08	2.54633e-05
SIGLEC16	-1.64827	4.3536e-08	2.69612e-05
ORM1	-1.91377	5.00893e-08	3.02982e-05
IGFBP1	3.08962	6.41208e-08	3.79041e-05
AC112518.1	-1.86998	6.92224e-08	4.00105e-05
RNA5SP150	-2.82608	8.21904e-08	4.64733e-05
MT-TI	-1.85097	9.98449e-08	5.52546e-05
AL049870.3	-1.53663	1.14774e-07	6.21932e-05
TUBA3C	-1.86508	1.4506e-07	7.7e-05
SLC12A3	-1.71922	1.71812e-07	8.93767e-05
IGLV4-60	-1.69837	1.89519e-07	9.66544e-05
MT-TM	-1.57212	2.09811e-07	0.000104946
KLK7	-1.83594	2.26096e-07	0.000110958
TM4SF20	2.57041	2.50653e-07	0.000120731
SFTPB	-1.65781	2.63677e-07	0.000124695
RNA5SP24	-2.15177	2.76567e-07	0.000128456
KRT71	3.26117	2.95171e-07	0.000134691
TDO2	1.54291	3.45638e-07	0.000153735
MTCO1P21	2.74935	3.48727e-07	0.000153735
FBXO36P1	-1.60868	3.59027e-07	0.00015527
LCE3D	-2.11238	3.64147e-07	0.00015527
MUC5AC	2.15519	4.41204e-07	0.000185092
DPEP3	-2.18132	4.70107e-07	0.000194087
VTN	1.80688	5.24209e-07	0.000213042
EDN2	1.11009	6.43141e-07	0.000257355
PPP1R14A	1.05501	7.40837e-07	0.000290979
AC144831.1	-1.33283	7.49543e-07	0.000290979
IGHV1-3	1.88154	9.94172e-07	0.000380271
CCL22	1.26572	1.0277e-06	0.000387397
HMOX1	0.954707	1.12739e-06	0.000418905
CDH17	1.80049	1.25644e-06	0.000460282
LGALS3	0.56149	1.30042e-06	0.000469775
GP2	2.77492	1.33918e-06	0.000475844
MYL3	1.5574	1.3538e-06	0.000475844
ANKRD20A19P	-1.59512	1.49111e-06	0.000517115
RAMP3	-0.897174	1.51262e-06	0.000517676
DLGAP3	-1.29743	1.57403e-06	0.000531697
IGHV3-49	1.67736	2.08756e-06	0.00069612
AC021744.1	-2.28413	2.19392e-06	0.000722327
RBP4	1.95085	2.27439e-06	0.000735902
ISL2	-1.45115	2.29173e-06	0.000735902
IGLV8-61	-1.4755	2.3624e-06	0.000749342
AC104417.2	-1.72625	2.45606e-06	0.000769664
GPR50	2.22631	2.73777e-06	0.000847732
LCE3E	-1.925	2.85372e-06	0.000873239
RIMKLB	-0.730585	2.97462e-06	0.000899651
IGHD3-9	2.34859	3.02248e-06	0.000903617
AC132825.1	1.82902	3.31615e-06	0.000980147
BARX1	-1.82249	3.54421e-06	0.00103579
PAGE2	-2.61321	3.62096e-06	0.00104646
DLX2	-1.61364	3.91949e-06	0.00112029
AMTN	2.90377	4.09918e-06	0.00115891
FOSB	1.08782	5.01845e-06	0.00139297
CGB5	-1.67134	5.0342e-06	0.00139297
DPYSL5	-1.53013	5.51397e-06	0.00150967
TM4SF5	2.09578	5.73479e-06	0.00155377
TAC1	1.6715	5.91808e-06	0.00158023
LGALS4	1.75693	5.95396e-06	0.00158023
ACTG2	1.20086	6.86496e-06	0.00180361
MTCO3P13	1.60844	6.97174e-06	0.00181335
SHH	0.988265	7.44137e-06	0.00191634
AMBN	2.85846	8.00432e-06	0.0020411
RNA5SP370	-1.69324	8.88594e-06	0.00224392
DUSP1	0.698158	9.40591e-06	0.00235238
KC877982.1	2.47654	9.63448e-06	0.0023866
GDF3	1.6634	1.00544e-05	0.00246712
CLEC3A	2.11945	1.06757e-05	0.00259509
LINC01413	-1.34118	1.0943e-05	0.00263023
CNN1	1.13778	1.10225e-05	0.00263023
RNA5SP68	-1.63284	1.13722e-05	0.00268094
RPS21	-0.530488	1.14411e-05	0.00268094
LINC02474	-1.4781	1.25477e-05	0.00291399
CALCB	2.4021	1.2815e-05	0.00294971
ATF3	0.721265	1.30385e-05	0.00297484
DHRS2	-1.92319	1.3885e-05	0.00314044
MYL10	-1.33511	1.40781e-05	0.00315665
MYH11	1.16346	1.45933e-05	0.0032442
NKX2-1	-1.95877	1.48359e-05	0.00327018
PROK1	1.32218	1.50556e-05	0.00329072
RNA5SP366	-2.60634	1.53075e-05	0.00330476
KRT72	1.84345	1.53739e-05	0.00330476
MAGEA8	1.82132	1.60042e-05	0.00341205
MTND4P12	-1.00954	1.62751e-05	0.00344159
CR381670.1	-1.27683	1.74527e-05	0.00366085
CXCL5	1.37785	1.77301e-05	0.00368927
ZFP36	0.648094	1.82634e-05	0.00377008
DEPP1	0.703924	1.86054e-05	0.00381045
MTCO2P5	2.25077	1.90461e-05	0.00387023
KRT27	2.46523	1.92335e-05	0.00387071
PI16	1.34818	1.93461e-05	0.00387071
IGKV3D-15	-1.32757	2.02031e-05	0.00401133
DES	1.52984	2.09769e-05	0.00413339
COL9A3	-1.21586	2.1808e-05	0.00426485
LEFTY2	1.39613	2.29628e-05	0.00445718
NT5DC2	-0.462223	2.44276e-05	0.00470639
APOC3	1.84328	2.50241e-05	0.00478586
AC129507.1	-1.23217	2.52602e-05	0.00479576
HAND2	0.898244	2.62996e-05	0.00494733
CAMP	1.50096	2.6439e-05	0.00494733
BCAR4	-1.24523	2.72918e-05	0.00503781
GNAT3	1.84966	2.731e-05	0.00503781
CARTPT	-1.67067	2.75801e-05	0.00505182
RNA5SP190	-1.75818	2.8939e-05	0.00525806
IGLV5-45	1.58154	2.91104e-05	0.00525806
MT-TH	-0.972755	3.04392e-05	0.00546015
DUSP27	1.91826	3.2629e-05	0.00581288
GNLY	0.983883	3.42714e-05	0.00606395
CHRDL2	1.36763	3.64063e-05	0.00634725
ADM	0.73527	3.64726e-05	0.00634725
RNA5SP45	-1.99911	3.66047e-05	0.00634725
MTND3P19	1.5825	3.72655e-05	0.00641905
CSN3	2.87104	4.13564e-05	0.00707684
FRZB	-0.703963	4.51534e-05	0.00762623
AP000527.1	-1.64625	4.74888e-05	0.00796893
F2	1.59731	4.94235e-05	0.00824042
TF	1.54251	5.01006e-05	0.0083001
LINC01511	-1.32856	5.18087e-05	0.00852877
AC053503.4	1.56209	5.51176e-05	0.0090164
DLK1	2.5589	5.62162e-05	0.00913864
FP671120.6	2.79305	5.74283e-05	0.00921419
RPS7P10	-0.831872	5.78585e-05	0.00921419
C1QTNF9B	-1.12716	5.79508e-05	0.00921419
KCNK3	1.10602	5.83769e-05	0.00921419
GSTA1	1.44415	5.84522e-05	0.00921419
RNA5SP259	-2.16087	5.88288e-05	0.0092177
RNA5SP388	-1.72924	6.02998e-05	0.0093916
LHX2	-1.09324	6.14666e-05	0.00951634
IER3	0.605453	6.32016e-05	0.00968802
ENPP3	1.26507	6.33204e-05	0.00968802
AC090970.1	1.48169	6.41001e-05	0.00974996
CTSK	0.63163	6.53225e-05	0.00987812
LTF	1.58276	6.68774e-05	0.0100548
VSIG1	1.15626	6.8749e-05	0.0102768
ASCL1	-1.806	7.06128e-05	0.0104951
PGBD4P8	1.71338	7.38692e-05	0.0108841
CGA	-1.25372	7.40673e-05	0.0108841
PRSS3	1.43797	7.67355e-05	0.0111686
GUCA2B	-1.29829	7.71245e-05	0.0111686
CEBPD	0.45833	7.72913e-05	0.0111686
NEUROG3	-1.22182	8.05695e-05	0.011578
SLC46A2	1.32345	8.14554e-05	0.011641
GSX1	1.85164	8.66036e-05	0.0123091
AC064853.1	2.09043	8.73258e-05	0.0123443
AL158823.1	-1.03679	9.13324e-05	0.0128182
RND3	0.470152	9.16638e-05	0.0128182
AL035258.1	1.94305	9.73354e-05	0.0135385
GEM	0.618594	0.000101	0.0139735
DPP6	1.09015	0.000105633	0.0145371
IGKV3OR2-268	-1.24496	0.000107449	0.0147043
ITLN1	1.49236	0.000107979	0.0147043
COL6A1	0.59443	0.000124305	0.0168395
SULT2B1	0.814671	0.000125587	0.0169249
KLK6	-1.22957	0.00013087	0.0175212
PAGE1	-1.17813	0.000131657	0.0175212
MMP9	0.919669	0.000132345	0.0175212
TBX3	0.588075	0.000132706	0.0175212
CSF3	1.06941	0.00013657	0.0179403
L1CAM	-1.15784	0.000137835	0.0180156
S100A6	0.694751	0.000147395	0.0191235
IGHV3-64	1.25962	0.000149006	0.0191235
GADD45B	0.480791	0.000149166	0.0191235
MME	0.833944	0.000149466	0.0191235
PICSAR	-1.23027	0.000150388	0.0191235
AL583785.1	-1.37954	0.000150723	0.0191235
SMS	-0.473426	0.000152722	0.0192517
SERTM2	1.26089	0.000153576	0.0192517
MAFF	0.502163	0.000154339	0.0192517
MRGPRF	0.711413	0.000154694	0.0192517
LCN2	1.0074	0.000164146	0.0203307
RNA5SP372	-1.81099	0.000165573	0.0203365
IL1A	1.15806	0.000165757	0.0203365
NKX2-5	1.66333	0.000166761	0.0203636
RNA5SP226	-1.49993	0.0001685	0.0204798
PRPH	-1.22501	0.000172366	0.0208522
PTX3	-0.88329	0.000181071	0.0217035
CCN1	0.507624	0.000188198	0.0224543
C11orf96	0.658627	0.000190421	0.0225616
MTRNR2L1	1.78384	0.000190833	0.0225616
AC111000.2	0.800122	0.000192324	0.0225663
RNA5SP263	-1.76218	0.000192607	0.0225663
CXCL2	0.899008	0.000194871	0.0226643
TGFB2-AS1	-0.809077	0.000195186	0.0226643
HSD11B1	1.00341	0.000197008	0.0227741
PGC	1.31375	0.000200613	0.0230882
FAM89A	0.551262	0.000203561	0.0232989
CD109	0.806392	0.000204309	0.0232989
TACC1	0.491186	0.000205131	0.0232989
S100A10	0.562584	0.000206558	0.023359
SORBS1	0.640661	0.000209242	0.0235602
NR4A1	0.657753	0.000213944	0.0239857
AL713998.1	1.35923	0.000215575	0.0240649
KRT28	2.06613	0.000229139	0.0253613
LINC00942	1.3163	0.000230394	0.0253922
FABP3	0.890007	0.000233337	0.025608
DOK5	-0.920772	0.000235168	0.0257005
KLK3	-1.25275	0.000237509	0.0258478
MGLL	0.495411	0.000240022	0.0259045
BIRC7	-0.929687	0.000242287	0.0260408
RNA5SP473	-1.19333	0.000245278	0.0261754
RNF39	0.703375	0.000245552	0.0261754
MTCO1P5	1.62668	0.000259112	0.027231
TMEM119	0.626843	0.000259642	0.027231
S100P	1.11318	0.000273651	0.028585
THBD	0.617053	0.000277951	0.028918
PEG3	1.02116	0.000282135	0.0292364
CXCL3	0.822023	0.000292022	0.0301409
LRRC15	1.32153	0.000294839	0.0302712
TCEAL7	0.704254	0.000295613	0.0302712
AC020922.3	-0.871926	0.000298852	0.0304829
ARX	-1.4044	0.000300081	0.0304887
CRCT1	-1.40966	0.00030709	0.0309109
RASL11A	0.644565	0.000307649	0.0309109
SP6	0.940921	0.000307802	0.0309109
ACTL6B	-1.12467	0.000322529	0.0321417
TGFBR3	0.712326	0.000330312	0.0327917
SIX3-AS1	-1.04557	0.000335445	0.0331746
MTCO1P4	1.62451	0.000341597	0.033655
FOS	0.656431	0.000348329	0.0341888
RNA5SP325	-1.61601	0.000351704	0.0343903
PLAC9	0.819507	0.000367992	0.0357031
APOA1	-1.40826	0.000369247	0.0357031
AC025674.1	-1.38001	0.00037125	0.0357638
AL596247.1	1.21214	0.000390978	0.0373872
RCAN1	0.674731	0.000403202	0.038415
VTRNA1-2	-1.04213	0.000414674	0.0390935
MTCO1P25	1.38944	0.000414833	0.0390935
MYLK	0.5749	0.000424192	0.0398312
AC138305.3	0.646409	0.000426626	0.0399156
LINC01833	-0.927638	0.000437114	0.0407503
RNA5SP74	-1.38022	0.000439336	0.0407668
ENDOU	1.23041	0.000440425	0.0407668
LMTK3	0.523176	0.000447704	0.0412936
ROS1	-0.998844	0.000453907	0.041579
H19	-0.830926	0.000453996	0.041579
LINC01724	1.337	0.000472064	0.0430821
GPR83	1.09274	0.000473891	0.0430975
ATP2A1-AS1	-0.522659	0.000486114	0.0438244
MEOX1	-0.81902	0.000488286	0.0438244
CAMK2N2	-0.851819	0.000488446	0.0438244
AC106738.1	-0.971368	0.000488623	0.0438244
LIF	0.731014	0.000491031	0.043889
RNA5SP419	-1.14334	0.000498844	0.0444347
CLIC5	0.63065	0.000506463	0.044904
IGHV3-7	-1.19953	0.000507566	0.044904
MTCO1P24	1.43021	0.00051062	0.0450211
IDO1	0.751738	0.000513653	0.0451355
FGG	1.64674	0.000528733	0.0461907
RNA5SP298	-1.21678	0.000529213	0.0461907
TG	-1.05359	0.000536973	0.0467113
RNU6ATAC	-0.893564	0.000539496	0.0467404
ARSE	0.823591	0.000561989	0.0479257
LINC01896	1.41605	0.000565224	0.0480441
ID3	0.474633	0.000575831	0.0487862
AL161431.1	-1.40121	0.000582707	0.0490492
ARL14	0.977915	0.000585633	0.0491365
CCL20	0.919865	0.000592029	0.049164
PDK4	0.564511	0.000592324	0.049164
RNA5SP69	-1.63987	0.000594314	0.049164
PPP1R12B	0.622539	0.000594478	0.049164
BX322559.1	0.935944	0.000595412	0.049164
SMIM32	-1.04986	0.00061278	0.0501239
DGCR9	-0.932512	0.00061386	0.0501239
MPPED1	1.20425	0.000625944	0.0508775
MIR503HG	0.938738	0.000628827	0.0509526
LINC02167	-1.60402	0.000634772	0.0512095
PNRC2P1	-1.00973	0.000635935	0.0512095
EDN1	0.508983	0.000638758	0.0512781
SPARCL1	0.601726	0.000643389	0.0514909
PRDM1	0.4777	0.00064931	0.0518054
LINC01639	1.53229	0.0006554	0.0521314
KLHDC7B	-0.767479	0.000665494	0.0527729
MTCO3P27	1.35699	0.000676527	0.053344
TBX10	1.19771	0.000676799	0.053344
RNA5SP250	-1.60615	0.000689823	0.0542064
ATOH8	0.755571	0.000700706	0.0548957
CDKN2C	-0.536656	0.000709952	0.055453
LINC00524	1.08897	0.000719445	0.0560262
HPR	-1.29381	0.000724649	0.0562443
TMEM190	-1.22542	0.00072657	0.0562443
BIRC3	0.586778	0.000730961	0.0564163
MTCO1P45	1.36048	0.000733153	0.0564181
RPS15AP17	0.627539	0.000735759	0.0564395
PLA2G4D	1.25532	0.000737771	0.0564395
SCGB1A1	1.42859	0.000750474	0.0572429
RPL34P27	-0.678461	0.000772435	0.0585744
CEL	-0.893474	0.000777294	0.0587663
SMIM24	0.928966	0.000779483	0.0587663
C15orf62	0.607828	0.000782412	0.0587817
AL162411.1	-0.853118	0.000784208	0.0587817
LINC00626	-0.933904	0.000802195	0.0599572
RNA5SP452	-1.48763	0.000825305	0.0613319
IGKV6-21	1.24841	0.000840787	0.0623045
UGT2B17	1.30923	0.000846325	0.0624732
AP003032.1	-0.652536	0.000847867	0.0624732
KRT85	-1.62633	0.00085725	0.062986
ORM2	-0.952621	0.00086581	0.0632653
FILIP1L	0.566991	0.000865914	0.0632653
RNA5SP417	-1.06656	0.000885626	0.064344
NEFH	-1.0605	0.000907898	0.0656033
MTND4P24	-1.10249	0.000908004	0.0656033
MEOX2	-1.05435	0.000928307	0.0666997
RNA5SP418	-1.05982	0.000933658	0.0668643
PLN	0.828288	0.000947254	0.0670256
IL32	0.542056	0.00094776	0.0670256
TRAJ35	1.18421	0.000948158	0.0670256
FOXL2	0.642029	0.000948305	0.0670256
FKBP5	0.648052	0.000960883	0.067485
MIR3609	-0.877896	0.000962078	0.067485
IGKV1OR10-1	-1.15014	0.000962588	0.067485
TRHDE-AS1	-1.02157	0.00098009	0.0682139
SNORA20	-0.816514	0.000980853	0.0682139
AL049872.1	-0.507477	0.000989076	0.0684199
RNA5SP432	-1.3918	0.000998705	0.0686221
SNORA47	-0.751025	0.000999915	0.0686221
SRPX	0.682385	0.00101168	0.068884
AL589182.1	-1.0901	0.00101831	0.0689963
IGLV1-36	-1.09122	0.00102111	0.0689963
IGHV4-4	-1.07693	0.00102128	0.0689963
IGLJ6	1.30381	0.00102638	0.0691608
SLC5A5	1.01807	0.00103374	0.069455
SIGLEC11	-0.960956	0.00103727	0.069455
FOSL1	0.565782	0.00103875	0.069455
PPIAP74	-0.862845	0.00105077	0.070078
7SK	-0.76409	0.0010739	0.071438
AC002401.4	0.942476	0.00107739	0.0714869
AL023803.1	-0.605281	0.00108975	0.0719491
S100A3	1.09948	0.00108989	0.0719491
AC120498.8	1.11662	0.00109829	0.0722595
ITLN2	1.32234	0.00110015	0.0722595
CADM3	1.13467	0.00110562	0.072436
SCGB2A2	-1.39264	0.00116009	0.0758142
RPSAP19	-0.629904	0.00118049	0.0767611
AC124067.2	-0.761332	0.00119091	0.0770927
OLFM4	1.36531	0.00119151	0.0770927
STIM2-AS1	-0.560662	0.00120772	0.0771692
MAGEC2	-1.65766	0.00120791	0.0771692
IGKV1D-33	1.44542	0.00122531	0.0778308
IGHV2-5	-1.02438	0.00122985	0.0778308
IGKV1D-39	1.36193	0.00124273	0.0783163
ECM1	0.612365	0.00124355	0.0783163
SSTR1	1.01104	0.00124839	0.0784317
HSPB7	0.771918	0.00125708	0.0787869
MRC1	0.835045	0.00133751	0.0832267
CSDC2	0.709205	0.00134207	0.0833107
MRAP2	0.497964	0.00135932	0.0841811
KRT43P	1.10519	0.00138018	0.0852696
OSR2	0.55482	0.00140503	0.0865991
RNU7-19P	-1.01472	0.00140958	0.0866741
IGLV3-27	1.32231	0.00141829	0.0867994
EYA4	-0.970439	0.00142359	0.0868982
BX470102.1	0.669083	0.00142888	0.0868982
G0S2	0.56829	0.00143249	0.0868982
SNORA79B	-0.755765	0.00143336	0.0868982
CRISP3	1.21866	0.00143661	0.0868982
ATP1B2	0.588251	0.00144454	0.0871752
COLEC12	0.760535	0.0014663	0.0880794
VGF	1.18001	0.00147554	0.0884304
AC131902.2	-0.98137	0.00150074	0.0896463
FAM189A1	0.758273	0.00150408	0.0896463
HSPE1P7	-0.932237	0.00152021	0.0896463
NUDT10	0.665531	0.00152205	0.0896463
CDH16	1.11308	0.0015234	0.0896463
LMOD1	0.698378	0.00153438	0.089886
RNA5SP262	-1.5423	0.00153439	0.089886
AC083967.1	-1.19564	0.00154841	0.0903423
CRISP2	-1.08758	0.00155967	0.0903423
IGLC7	-1.01616	0.00155969	0.0903423
TGFB2	-0.638052	0.00156169	0.0903423
OR2B6	-0.805279	0.00156302	0.0903423
SSPN	0.501642	0.00157276	0.0905073
AL357552.2	1.21836	0.00157283	0.0905073
TP63	-0.79675	0.00158147	0.0908038
TM4SF4	0.982403	0.00159082	0.0911393
HOXC-AS1	-0.893271	0.00162463	0.0927248
KRT20	1.19585	0.00162563	0.0927248
RNA5SP412	-1.00382	0.00163815	0.0930314
RNA5SP469	-1.04	0.00164712	0.093337
LHX1-DT	-1.0294	0.00166943	0.0940811
MTND5P11	0.818218	0.00166956	0.0940811
MIA	-0.944479	0.00167371	0.0940811
SLC47A2	-0.839983	0.00167472	0.0940811
HOXA6	-0.747615	0.00169287	0.0948953
DNER	-0.856845	0.0017045	0.0953197
AC022034.3	-0.98002	0.00170776	0.0953197
MAGEC1	-1.38423	0.00171872	0.0957257
ACY3	0.636769	0.00172499	0.0958695
AL365181.2	0.848891	0.00175039	0.0970737
TSPAN2	0.666446	0.00176456	0.0973515
ABHD12B	0.9796	0.0017664	0.0973515
RNA5SP225	-2.09103	0.00176663	0.0973515
TMEM158	0.546332	0.00179572	0.0985145
L1TD1	-0.935636	0.00181595	0.0990209
RPS26P47	-1.02252	0.00184754	0.100323
AL122058.1	-0.894303	0.00186863	0.10101
LINC01108	0.997092	0.00187184	0.10101
RHOXF1	0.941039	0.00188887	0.101471
IGKV1D-35	1.0438	0.00189317	0.101471
RNA5SP38	-1.30852	0.00189599	0.101471
SYNPO2	0.594479	0.00191011	0.101809
HMGB1P5	-0.892124	0.00191405	0.101809
DUSP5	0.540346	0.00198747	0.105283
RNA5SP437	-0.950386	0.00201154	0.105857
PHLDA2	0.592118	0.00201218	0.105857
BRINP3	1.16838	0.00201232	0.105857
ALDH1A1	0.698352	0.00202672	0.10628
MESP2	-0.793406	0.00203623	0.106419
ABI3BP	0.60774	0.0020629	0.107312
RNA5SP462	-1.0039	0.00207347	0.107647
RNA5SP42	-1.13959	0.00209428	0.108188
ID1	0.47012	0.00210439	0.108188
CHST2	-0.574283	0.00210906	0.108188
SNORA38B	-0.860715	0.0021107	0.108188
HMGCS2	1.14108	0.00213021	0.108641
LAMA2	0.670781	0.00213691	0.108769
NPR3	0.612541	0.00217655	0.11025
TCF15	-0.6918	0.00217871	0.11025
CYP1B1	0.658838	0.00218589	0.110398
AC078817.1	-0.610508	0.00219162	0.110473
AC093787.1	-0.891004	0.00219892	0.110591
SHISA2	0.765095	0.00220246	0.110591
MUC3A	0.94105	0.00222155	0.111334
MYL2	1.03068	0.00223224	0.111446
AL109615.3	-0.612308	0.00224295	0.111761
RSPO3	-0.785064	0.00227244	0.113014
LCN1	0.97505	0.00228743	0.113151
SOX14	1.12733	0.00228825	0.113151
CPNE4	-0.892912	0.00230211	0.11362
LIPC	0.951606	0.00233033	0.114795
RNU7-84P	-0.931962	0.00233734	0.114923
LCN15	-1.08221	0.00234176	0.114923
AC112491.1	0.543785	0.00237256	0.116128
UPK2	0.666447	0.00237523	0.116128
TSHZ3	0.508789	0.00239594	0.116754
SNORD67	-0.882017	0.00239703	0.116754
CLDN5	0.526746	0.00243716	0.117698
LINC00624	-0.854943	0.00243904	0.117698
COL2A1	-1.11795	0.00245003	0.11801
ELAVL3	-0.903194	0.00245611	0.118084
FGA	1.25392	0.0024752	0.118515
SLC4A4	0.782365	0.00247763	0.118515
BCAN	0.835034	0.00248331	0.118515
FIBCD1	0.876188	0.00253689	0.12063
PI3	0.998594	0.00257055	0.121662
MMP3	0.916541	0.0025711	0.121662
RPS4XP22	-0.54177	0.00257263	0.121662
SBSN	-1.04859	0.0026065	0.122696
NRTN	0.624677	0.00260756	0.122696
RPS24P7	-0.805635	0.00263048	0.123277
IDO2	0.992023	0.00266943	0.124878
FGF19	1.23086	0.00269697	0.125658
ISL1	-0.824691	0.00272362	0.126277
CCL2	0.507065	0.00280989	0.130045
AC141557.1	0.785786	0.00285213	0.131566
NPW	0.778129	0.00285287	0.131566
IGHV1OR21-1	-0.918234	0.00286829	0.132036
CXCL11	0.692334	0.00289619	0.132656
RNU1-88P	-0.891479	0.0028969	0.132656
RNA5SP301	-0.893225	0.00293128	0.133759
ABCC2	0.909311	0.00296518	0.134833
RCAN2	0.5532	0.00299094	0.135318
RNA5SP429	-1.31352	0.00309452	0.138306
RNU4-2	-0.941908	0.0030952	0.138306
SNORA74D	-0.76784	0.00310984	0.138439
AC103563.1	-1.14027	0.00312843	0.138439
HSD17B2	0.794318	0.00312931	0.138439
SPON1	-0.795995	0.00314736	0.138986
DLX1	-1.07633	0.00316922	0.139478
CST2	1.14796	0.00319264	0.140187
TMSB15A	-0.603921	0.00321795	0.140685
FLNC	0.685419	0.00321828	0.140685
SYNDIG1L	0.996896	0.00323323	0.14103
MUCL1	-1.30287	0.00323702	0.14103
ALX4	1.14383	0.00329758	0.14295
CELSR3	-0.645508	0.00335718	0.144833
IGF2	0.901854	0.00335771	0.144833
ELOVL3	0.873233	0.00337386	0.145288
PHF24	0.951795	0.00349217	0.149745
S100A5	-0.804652	0.00349685	0.149745
CD36	0.850294	0.0035015	0.149745
AC024145.1	0.840184	0.0035334	0.150662
AC010547.2	0.764574	0.00362739	0.153913
FABP1	1.6174	0.00367066	0.155495
GSTA9P	-0.846019	0.00367679	0.155501
AL049830.1	-0.645761	0.00369331	0.155946
DUSP2	0.475028	0.00372415	0.156873
PPIAP29	-0.714604	0.00375405	0.157489
RNU7-61P	-0.880558	0.00376297	0.157609
OGN	0.874036	0.00379006	0.158488
QPCT	0.591439	0.00384465	0.160257
AC106876.1	0.980069	0.00384469	0.160257
CTSW	0.527342	0.00387584	0.161039
SFRP5	-1.01979	0.00392307	0.162188
JAM2	0.591982	0.00396115	0.162311
IGHD2-21	-1.43451	0.00396303	0.162311
HMGN2P41	-0.789426	0.00397405	0.162311
AC078962.1	0.94351	0.00397509	0.162311
IGLV3-10	1.01567	0.0040107	0.163438
TMEM72	-0.661489	0.00404414	0.163844
AP001783.1	-0.908268	0.00406181	0.164227
FARP1-AS1	-0.634965	0.00407295	0.164244
PIP	-1.16426	0.00409825	0.164977
HLA-DRB6	0.58569	0.00410382	0.164977
CELF3	-0.770959	0.00411558	0.165112
LRRN4CL	0.513262	0.00412726	0.165112
LINC01805	1.14214	0.0041385	0.165112
BHLHE41	0.507913	0.00414705	0.165112
BTF3L4P2	-0.508667	0.00416155	0.165112
OLFM3	-0.809953	0.00416158	0.165112
AC009244.1	-0.739403	0.00417066	0.165112
IGLV3-13	0.903451	0.00420563	0.16574
SLC13A2	1.02805	0.00422417	0.166219
PTCH2	-0.483828	0.00423096	0.166235
KRT39	0.885278	0.00424224	0.166426
IGFBP6	0.487809	0.00428774	0.167958
AC007218.1	1.15542	0.00429868	0.168031
RNA5SP130	-1.26417	0.00430253	0.168031
RNA5SP227	-1.27029	0.00432243	0.168422
KCNMB1	0.611433	0.00432592	0.168422
HNRNPCP2	-0.586035	0.00433843	0.168422
AC012123.1	-0.4744	0.00437663	0.169399
SERTM1	0.59573	0.00440102	0.17009
SSTR5	-0.946605	0.00440963	0.17017
ITIH2	0.921774	0.00447782	0.172071
CHODL	-0.700188	0.00447873	0.172071
PRND	-0.840607	0.00448574	0.172086
HRK	-0.761439	0.00449347	0.172128
BCAM	-0.453421	0.00452789	0.17319
SEMA3G	0.46503	0.00457882	0.174084
NR2F1	-0.490221	0.00460877	0.174125
WT1	-0.768316	0.00461254	0.174125
MMP13	0.883429	0.00464254	0.17475
SNORA14B	-0.599793	0.00471669	0.176104
CHRDL1	0.80222	0.00471967	0.176104
PSD	0.470796	0.00472089	0.176104
TENT5B	0.499593	0.00476815	0.176918
RPS24P16	-0.731738	0.0047884	0.177164
KCNE4	0.495743	0.00483091	0.177475
TNFSF11	0.701878	0.00486902	0.17812
ZCCHC12	0.743544	0.0049001	0.178754
LINC02178	1.19191	0.00492018	0.179235
SHISAL1	0.68868	0.00497882	0.180865
AFP	0.963765	0.00498887	0.180977
CXCL12	0.504312	0.00502706	0.182108
HOXC-AS3	-0.818009	0.00505276	0.182531
RNA5SP321	-1.04472	0.00512038	0.184516
SLC39A8	0.466088	0.00513313	0.184665
FABP9	1.18114	0.00515519	0.185202
RNA5SP421	-1.00745	0.0051745	0.185242
KLK8	-0.919506	0.0052005	0.185804
IGLV3-16	-0.867464	0.00522509	0.186426
SP8	-1.06775	0.00523566	0.186547
C16orf74	0.573468	0.00528485	0.18768
RNA5SP350	-1.13443	0.00528911	0.18768
CST7	0.481542	0.00532524	0.188705
TTR	0.902968	0.00540541	0.190642
HLA-U	0.933053	0.00540922	0.190642
ACTBP12	-1.05441	0.00544615	0.191166
UPK1A	0.86015	0.00546875	0.191443
MST1P2	-0.49814	0.00554188	0.193742
HPD	0.830001	0.00557998	0.194813
ATP6V1B1	-0.590446	0.00563324	0.195747
ELN	-0.524558	0.00572471	0.197742
KLF14	-0.80608	0.00575543	0.198276
IL17B	-0.873668	0.00578052	0.198819
Z69706.1	-0.477182	0.0058198	0.199538
PTGIS	0.686794	0.00582602	0.199538
FGF3	1.40537	0.00583041	0.199538
AL033519.4	-0.836176	0.00585655	0.200169
BAMBI	0.619549	0.00586485	0.20019
NEU4	-0.812063	0.00590947	0.201449
AC126175.2	0.892861	0.00593732	0.202073
LBP	1.17254	0.00596601	0.20236
RNA5SP140	-2.12904	0.00596945	0.20236
AC018695.1	-0.637118	0.0059751	0.20236
JPH4	0.699561	0.00601211	0.202821
OBP2A	1.25486	0.00603205	0.20323
RNA5SP416	-0.86051	0.00608507	0.204524
RNA5SP326	-1.29873	0.00609273	0.204524
AC241585.1	-0.633386	0.00611892	0.205094
RNA5SP502	-1.31417	0.00615778	0.205789
ANGPTL7	-0.817996	0.00616338	0.205789
SNORA84	-0.775597	0.00622351	0.207059
AC010970.1	-1.04266	0.00624106	0.207059
PCDHGB7	-0.604928	0.00624157	0.207059
IGLV3-6	0.86584	0.0062492	0.207059
FDCSP	1.27367	0.0062573	0.207064
AC012085.2	0.792777	0.00628898	0.207584
TRAV39	-0.709072	0.0063105	0.20803
CAPN8	0.631446	0.00636888	0.20916
GDF10	0.768944	0.00638924	0.209167
AC005884.2	0.825675	0.00639322	0.209167
RNA5SP506	-1.28275	0.00643191	0.209574
IGKV2OR2-1	-0.901812	0.00643806	0.209574
OTOS	1.01295	0.00644237	0.209574
PTGER3	0.798752	0.00645798	0.209574
AP003071.4	0.650987	0.00646068	0.209574
ARHGAP29-AS1	-0.831458	0.006473	0.209574
TRIM15	0.661056	0.0064951	0.209574
BEX1	-0.759696	0.00649576	0.209574
FAM9C	1.0759	0.00650095	0.209574
CALB2	1.16054	0.00650244	0.209574
MASP1	0.760481	0.00651041	0.209574
LRP2	0.928881	0.0065554	0.210385
SLC17A7	0.850292	0.0065664	0.210385
NRAD1	0.608804	0.00661929	0.211768
AC062015.1	1.08171	0.00664835	0.212437
LINC02244	0.711246	0.00667486	0.213022
AL359555.1	-0.793764	0.00670612	0.213605
AC114801.3	0.958217	0.00675082	0.213933
RSPO1	0.741848	0.00675273	0.213933
KRT8P36	0.691332	0.0068163	0.215166
LINC00868	0.988661	0.00681649	0.215166
RNA5SP302	-1.72224	0.00684165	0.215699
FHL1	0.514103	0.00685589	0.215886
SNORA71A	-0.467579	0.0068665	0.215959
NODAL	0.903306	0.00697993	0.217945
MT1H	-0.756924	0.00699604	0.218186
CSN2	0.974236	0.00707862	0.219506
BPIFB1	1.16706	0.00708157	0.219506
SOCS2	0.461236	0.00709676	0.219506
GPR55	0.748585	0.00711233	0.219506
ATP2B2	-0.671603	0.00711619	0.219506
IGHV3-21	0.858906	0.00715635	0.22028
RNA5SP221	-1.58454	0.00721596	0.221615
RPS26P34	-0.795044	0.00721675	0.221615
SLC17A9	-0.529406	0.00722906	0.221726
C7	0.798958	0.00724043	0.221726
MIR3129	1.36249	0.00725446	0.221726
TEX101	-0.82584	0.00733148	0.223293
AC015660.2	0.739346	0.00737688	0.22415
DPT	0.697096	0.00740228	0.22466
ASGR2	0.725948	0.00751052	0.227679
GUCY1A2	0.592676	0.00754071	0.228328
MIR6736	-0.776575	0.0075666	0.228846
MTRNR2L8	0.861818	0.00758174	0.229037
RNA5SP423	-0.975708	0.00763624	0.230374
SFRP1	0.543684	0.00764964	0.230374
TFF1	0.893571	0.00765257	0.230374
CXCL13	0.766886	0.0076713	0.230671
PPP1R1A	-0.686308	0.00769292	0.231054
CNTN1	0.606826	0.0077235	0.231438
SNORA37	-0.826869	0.00776343	0.232281
NUPR2	0.757725	0.00782421	0.233113
FAM162B	0.470201	0.00785335	0.233685
MCCD1	0.965455	0.00787037	0.233685
RNA5SP353	-0.867946	0.00791029	0.234353
RIMBP2	0.607995	0.00792881	0.234617
AC010735.2	0.632225	0.00801385	0.236568
TCHH	0.959368	0.00802138	0.236568
HBQ1	-0.679101	0.00806384	0.237257
RNA5SP338	-1.75414	0.00816967	0.238797
GPR155	0.653709	0.00836606	0.24313
RPSAP7	-0.718292	0.00839592	0.243454
LHX1	-1.09424	0.00842165	0.243928
CCKBR	-0.747596	0.00847281	0.24426
FBXL16	-0.576457	0.00847358	0.24426
MGP	0.489056	0.00847652	0.24426
PRLH	-0.6921	0.00850449	0.24446
IL23A	0.464561	0.0085152	0.24446
RNA5SP411	-1.21703	0.00856961	0.245616
PAGE4	0.83234	0.0086025	0.245782
RNA5SP111	-0.79918	0.00860853	0.245782
FBP2	0.873444	0.00867187	0.247049
HMGB1P6	-0.635325	0.00871154	0.247847
PPP1R3C	0.486474	0.00874165	0.247847
PTGER1	-0.647582	0.00874371	0.247847
C19orf33	0.606354	0.00880081	0.248864
LINC02154	0.91005	0.0088264	0.249118
RNA5SP420	-0.783422	0.00884934	0.249118
MUC4	-0.787426	0.00889988	0.249784
CDH15	-0.686636	0.00898793	0.250241
IL20RB	0.623353	0.00898823	0.250241
ISM1	0.484058	0.00899452	0.250241
CYP2A6	0.992344	0.00900141	0.250241
CHAD	0.755105	0.00900939	0.250241
APOL1	0.458055	0.00901483	0.250241
ARHGDIG	0.800842	0.00905132	0.250719
CDX2	0.966386	0.00913027	0.252368
ANGPT4	-0.832038	0.00917532	0.253236
RNA5SP413	-1.08804	0.00924159	0.253767
MAMDC2	0.708369	0.00924917	0.253767
RNA5SP141	-1.5043	0.0093055	0.255043
AC079140.2	0.475188	0.00933378	0.255315
CHIT1	0.951414	0.00934824	0.255315
S100B	0.488795	0.00941514	0.256696
IQCA1	0.66414	0.00942668	0.256741
AC090116.1	0.620447	0.00946397	0.257336
RNA5SP71	-1.31665	0.0095274	0.258402
DPP4	0.643546	0.00955514	0.258884
PADI3	-0.786708	0.00958324	0.259106
AL157871.6	0.773825	0.0096364	0.260273
TRH	-1.35739	0.00973892	0.262556
AC018557.2	0.843093	0.00982369	0.263961
RNASE7	-0.754148	0.0098758	0.264992
GAL3ST2	-0.649291	0.0098951	0.264992
YWHAZP5	-0.679767	0.00990283	0.264992
SNORC	0.520209	0.00993232	0.265236
SNORA74A	-0.630854	0.009954	0.265542
AC006033.1	-0.678282	0.00999476	0.266356
RNA5SP323	-0.721172	0.0100806	0.268093
C20orf204	-0.598057	0.0101286	0.268821
SNORD8	-0.701985	0.0101549	0.269008
DMBX1	-0.695645	0.0101813	0.269008
HLA-DQA2	0.64584	0.0101836	0.269008
TRBV29-1	0.60598	0.010193	0.269008
MT-TS2	-0.593306	0.0101995	0.269008
GACAT2	0.919817	0.0102289	0.26901
AP000763.2	0.638446	0.0102635	0.269379
IGHD6-6	-1.26951	0.0102842	0.269379
LINC01977	-0.571538	0.0103215	0.270053
CCL21	0.724485	0.0103307	0.270053
ADH1B	0.795576	0.0104424	0.271606
REG1A	0.907965	0.0104805	0.272326
FOXQ1	0.558288	0.0105151	0.272952
ALDOC	-0.453237	0.0105386	0.273194
B4GALNT1	-0.717426	0.0105454	0.273194
CHST1	0.489681	0.0105569	0.273218
CD8B	0.576873	0.010607	0.273699
IGLVI-70	1.21141	0.0106379	0.273767
FGB	1.05108	0.0106889	0.27429
LINC02487	0.851571	0.0106932	0.27429
AC067817.2	0.772924	0.0107193	0.274689
FAM242C	-0.740876	0.0107594	0.275445
AC005255.1	-0.496464	0.0108004	0.275688
ADGRG7	1.01205	0.0108842	0.27716
AC017007.5	-0.84608	0.0108988	0.27716
IGLV3-22	0.818295	0.0109337	0.27745
EPHA8	0.959313	0.0110222	0.278587
FGF4	1.39046	0.0110321	0.278587
FMO3	-0.884518	0.011048	0.278719
RN7SKP80	-0.528432	0.0110713	0.278727
TLR8-AS1	-0.776432	0.0110791	0.278727
TCEA1P2	-0.542947	0.0110805	0.278727
KLK1	0.767489	0.0111225	0.279278
GCNT3	0.521026	0.0111239	0.279278
AL732366.2	-0.665638	0.0111419	0.279462
AC064834.1	-0.738331	0.0112134	0.280406
KCNJ4	-0.745866	0.0112329	0.280406
LINC01436	-0.788038	0.0112335	0.280406
SLC26A4	0.723882	0.0113975	0.284227
DMRTA2	-0.632075	0.0114249	0.284279
ANXA10	0.8079	0.0114661	0.284844
AL161785.1	-0.484742	0.0115879	0.287496
AC005696.4	-0.676125	0.0115949	0.287496
ITIH1	0.770608	0.0118059	0.29206
C4BPB	0.61793	0.0118126	0.29206
LINC02253	0.705773	0.0118773	0.293101
TNIK	0.618497	0.012024	0.295878
SMR3A	0.849678	0.0120483	0.295917
METTL24	-0.500886	0.0120656	0.295936
ATP6V1C2	0.478004	0.0120718	0.295936
CD5	0.460243	0.0121216	0.296877
DPEP1	0.937634	0.0121607	0.297337
RNU4-1	-0.805641	0.0122303	0.298415
NR5A2	0.545476	0.0122657	0.298794
RNA5SP185	-1.81002	0.01228	0.298794
SOD3	-0.527076	0.0123032	0.298794
RNY1	-0.870944	0.012307	0.298794
PDCL2	-0.862002	0.012313	0.298794
KERA	0.892609	0.0124727	0.302062
AC107956.1	-0.540365	0.0125169	0.302851
GAST	0.731153	0.0125762	0.303237
MEI1	-0.577628	0.0125823	0.303237
PLAC8	0.576105	0.0125911	0.303237
OR2I1P	0.620044	0.012634	0.303326
AL160279.1	0.772051	0.012641	0.303326
PLXNB3	-0.495014	0.0126603	0.303326
FXYD2	-0.806564	0.0126757	0.303326
RNU6-37P	0.900513	0.0126765	0.303326
RNA5SP528	-0.836354	0.0127164	0.303722
RNA5SP387	-1.6335	0.0127908	0.304939
RNA5SP422	-0.930403	0.0128905	0.307034
CTCFL	-0.934676	0.0129792	0.308427
NKX6-1	0.868044	0.0130515	0.309243
AC012354.3	-0.728028	0.0130545	0.309243
AC092569.1	0.618957	0.0130831	0.309382
VPREB1	0.963522	0.0130842	0.309382
RNVU1-7	-0.657302	0.0131093	0.309414
ENPP1	0.45831	0.0131839	0.310891
SNORA71D	-0.710111	0.0132185	0.311424
NR4A3	0.59973	0.0132628	0.311622
OPRK1	-0.687159	0.0133152	0.312288
TRIM16L	-0.455712	0.0133604	0.312913
RPL7P32	-0.553814	0.0134237	0.313983
PDLIM3	0.589256	0.0134474	0.314058
RNA5SP433	-0.877832	0.013451	0.314058
CORO6	-0.645809	0.0135083	0.314899
2020-03-04	-0.692541	0.0135112	0.314899
SHANK2-AS2	0.839872	0.0137549	0.318959
KRT1	-0.807981	0.013759	0.318959
AP001042.1	0.7611	0.013787	0.319236
GPT	-0.521561	0.0138542	0.319408
ACPP	0.504081	0.0138597	0.319408
OVAAL	-0.676438	0.0138598	0.319408
NFE4	0.738866	0.0138951	0.31964
ANKRD1	0.659229	0.013899	0.31964
CHGB	1.06872	0.0139363	0.319933
CES4A	-0.529382	0.0140285	0.321461
GPR173	-0.457819	0.0140531	0.32148
ADAMTS8	0.753921	0.0141268	0.322315
SCARNA6	-0.58261	0.0141566	0.322335
LIPH	0.629691	0.014266	0.323828
KLK5	-0.914461	0.0142679	0.323828
CHRNA1	0.699489	0.0143742	0.325674
SNORD15B	-0.491615	0.0144953	0.327751
IGLVI-63	0.790209	0.0145153	0.327751
MTATP8P2	-0.638926	0.0145541	0.327751
CALML3	1.30945	0.0145541	0.327751
LINC02381	-0.620753	0.0145747	0.32793
SPINK2	0.715083	0.014588	0.327946
SPINK13	0.721706	0.0146537	0.329138
EFNA2	-0.75307	0.0146765	0.329366
KIAA1210	0.726592	0.014696	0.329519
IGFL2-AS1	0.824012	0.0147269	0.329618
PSORS1C3	-0.655744	0.0147384	0.329618
GNG13	0.815969	0.0147978	0.330521
EVX1	0.771746	0.0148342	0.330521
KLHL35	-0.459184	0.0148396	0.330521
AC100757.2	0.813843	0.0149251	0.331363
ABCG2	0.488759	0.0149311	0.331363
KRT24	0.89716	0.0149858	0.332012
VSIG8	0.96935	0.0150387	0.332331
TRBV3-1	0.637833	0.0150486	0.332331
FBLL1	-0.534244	0.0150769	0.332331
LRP4	-0.645475	0.0151365	0.332463
IGKV1D-17	0.802798	0.0151374	0.332463
RNA5SP99	-1.5487	0.0151395	0.332463
AC012354.8	-0.635174	0.0151468	0.332463
RNY4	-0.799076	0.0152101	0.333106
HACD1	0.527548	0.0152132	0.333106
SYCE1L	0.523158	0.0152145	0.333106
HOXD11	0.645233	0.0152291	0.333145
MTND6P22	-0.755981	0.015249	0.333299
NELL2	0.677933	0.015303	0.333811
AL158801.5	-0.571801	0.0153164	0.333811
CPN2	0.855198	0.0153211	0.333811
RERG	0.522442	0.0153237	0.333811
PLA2G2D	0.737124	0.0153465	0.334027
AL117348.1	0.77554	0.0153752	0.334093
PNLDC1	0.83151	0.0154058	0.334477
IGHA2	0.682094	0.0154987	0.335424
CEACAM7	0.994568	0.0155989	0.336012
AL356364.1	1.05508	0.0156084	0.336012
AC004130.1	0.751447	0.0158766	0.339664
SCARNA22	-0.496825	0.0159645	0.340079
RPL29P19	0.607912	0.0160269	0.340576
KRT4	-0.913871	0.0160654	0.340833
FER1L6-AS2	-0.74837	0.0162988	0.3441
AC093270.1	-0.674181	0.0163482	0.344348
IGHV3-54	-0.687083	0.0163788	0.344391
CAVIN2	0.459197	0.0164795	0.346041
LY6L	1.16633	0.0165091	0.346041
SELENOOLP	-0.927068	0.0165411	0.346041
RPS27AP12	-0.564474	0.0165589	0.346041
OR7E100P	0.676978	0.0165797	0.346041
SNORA38	-0.664435	0.0165998	0.346041
AC004870.2	0.662261	0.0166036	0.346041
AC005725.1	0.695193	0.0166719	0.346648
AC073365.1	-0.813951	0.0166727	0.346648
RPRML	-0.693777	0.0168922	0.350552
RNU6-1114P	-0.698124	0.0169144	0.350552
OR7E24	-0.809048	0.0171172	0.353628
AL590999.1	0.622534	0.0172637	0.355525
AC093458.1	0.598805	0.0173082	0.35616
KCNJ12	-0.568685	0.0173831	0.356954
IGFN1	0.721676	0.0176093	0.360103
LINC02367	0.638098	0.0176106	0.360103
RNVU1-3	-0.458736	0.0177874	0.362863
PLA1A	0.483502	0.0178591	0.364041
SERPINA1	0.55916	0.0179825	0.365319
JPH2	0.576667	0.0179921	0.365319
RASD1	0.476571	0.0180307	0.365343
AC113935.1	-0.621081	0.0180494	0.365343
CST5	0.915985	0.018082	0.36535
CCL17	0.526146	0.0181132	0.36535
CASQ1	-0.664917	0.01812	0.36535
AL645924.1	-0.629538	0.018231	0.36613
SLC13A5	0.753922	0.0182893	0.366214
RELN	0.837742	0.0182896	0.366214
KLK2	0.783356	0.0183334	0.366809
UGT2B7	0.596012	0.0183799	0.367174
TRAJ23	0.692142	0.0184606	0.367815
MTCO1P35	0.930053	0.0184962	0.367815
IGLV10-54	0.798586	0.0184998	0.367815
AC012354.5	-0.682599	0.0185207	0.367815
PGAM1P4	-0.656599	0.0185207	0.367815
LINC01133	0.673965	0.0185724	0.368473
ARSEP1	0.612425	0.0186434	0.369601
RNA5SP29	-0.770435	0.0186704	0.369854
AQP10	-0.69015	0.0186981	0.370121
MIR4737	-0.590771	0.0189698	0.373576
IGKV1D-8	0.760093	0.0189733	0.373576
ELF5	0.577943	0.0190826	0.375445
LINC02351	-0.684751	0.0191575	0.376182
CXCL8	0.510402	0.0192272	0.376182
AC105219.2	-0.509696	0.0192508	0.376182
IGKV3D-25	0.724315	0.0192936	0.376182
SEM1P1	-0.486831	0.0193496	0.376991
RN7SL4P	-0.566245	0.0194389	0.377883
IGHV1-12	0.769506	0.0194664	0.378133
IGHV3-19	0.717558	0.0195033	0.37853
TMEM132E	-0.62364	0.0195212	0.37853
RNU6-549P	0.912494	0.0195517	0.37853
RNA5SP198	-0.814438	0.0196032	0.37853
RNA5SP25	-0.619827	0.0197447	0.379218
TWIST2	0.561776	0.01977	0.379218
BBOX1	-0.556798	0.0198297	0.380081
HSPB6	0.501782	0.0199099	0.381057
BCAS1	0.574728	0.019988	0.382003
CLDN17	-0.781038	0.0201616	0.384478
SFRP4	0.647395	0.0202194	0.384478
IL13RA2	-0.648228	0.0202228	0.384478
TNXB	0.597351	0.0202365	0.384478
MIR6746	-0.643905	0.0202941	0.384876
SCUBE2	0.503074	0.0207562	0.388952
AC005077.4	0.575344	0.020777	0.388952
AC093591.1	0.698562	0.0208887	0.390117
AC112771.1	-0.733524	0.0209961	0.390984
SLCO4A1	-0.577011	0.0209998	0.390984
MIR6774	-0.682409	0.0210752	0.391631
C10orf99	0.804924	0.0210797	0.391631
MYOCD	0.681768	0.0211784	0.392904
PHEX	-0.566192	0.0212339	0.393652
SLIT1	0.75755	0.0213397	0.394521
ZFR2	-0.649596	0.0213809	0.394969
AP003555.1	0.64979	0.0216135	0.397291
SNORA73B	-0.474146	0.0216481	0.397647
IGHV5-51	0.74651	0.0217305	0.398712
TAFA5	0.49082	0.0219596	0.401667
ENTPD8	0.570693	0.0219903	0.401688
CDKN2A	-0.482267	0.0219967	0.401688
ANXA13	0.714632	0.0220438	0.401799
IGHV3-30	0.640401	0.0221337	0.402492
AP002993.1	0.688936	0.0223972	0.405138
LINC02303	0.843465	0.022421	0.405138
AC104843.1	0.69861	0.0224298	0.405138
TRPV6	-0.495537	0.0225264	0.406319
GALR2	0.598016	0.0226237	0.407791
DACT3	0.456479	0.0226659	0.408269
RNA5SP410	-0.751089	0.0227259	0.408837
HMGN1P37	-0.508609	0.0229746	0.412686
MIR6806	-0.665597	0.0230234	0.412738
RBP7	0.517448	0.0230761	0.412819
UPK1B	0.660009	0.0230773	0.412819
HMGN2P17	-0.65358	0.0233274	0.416149
AC124947.2	-0.601251	0.023361	0.416463
POU4F1	-0.665459	0.0235485	0.417802
MLC1	-0.659404	0.0237157	0.419623
TAC3	0.700953	0.0238118	0.419928
GPIHBP1	0.612391	0.0240107	0.422417
RNA5SP251	-1.16323	0.0240799	0.422901
TRNP1	0.467711	0.0241511	0.423409
CLDN2	0.843069	0.0241545	0.423409
CT45A10	0.997867	0.0241739	0.423409
MIR6858	0.589802	0.0242546	0.423708
MT1L	0.470338	0.0242663	0.423708
TRDD2	-1.02202	0.0243645	0.424745
HRCT1	0.474322	0.0245009	0.426266
KRT14	0.959956	0.0245387	0.426519
EBF3	0.677627	0.0245482	0.426519
CTSV	0.513462	0.0246358	0.427755
CST1	1.07107	0.024675	0.428149
BMP6	0.531938	0.0247224	0.4284
CXCL6	0.687619	0.0247713	0.428962
TFR2	0.578606	0.0248382	0.429548
SOHLH1	0.821317	0.0248872	0.429825
SLITRK2	-0.639906	0.0249788	0.43064
RNA5SP85	-0.922021	0.0251736	0.432229
CLEC2L	0.716151	0.0251746	0.432229
LSM12P1	-0.478928	0.0252063	0.432229
BCHE	0.654132	0.0254864	0.43412
INSL4	0.824961	0.0255371	0.434228
TSPAN8	0.596955	0.0255831	0.434629
ZDHHC8P1	-0.478653	0.0256156	0.434896
HMX1	1.05214	0.0257416	0.435305
LINC01551	-0.67531	0.0258187	0.435305
AC135068.2	-0.668087	0.0258516	0.435492
SPAG11B	0.772296	0.0259334	0.436053
TAGLN3	-0.803318	0.0260756	0.437254
RNA5SP215	-1.27941	0.0260787	0.437254
HLA-DPB2	-0.485162	0.0260798	0.437254
SNORA11B	-0.636352	0.0260986	0.437254
SLC26A9	0.494243	0.0261075	0.437254
AC074033.1	-0.46741	0.0264335	0.44091
SCN1A	-0.62682	0.0264337	0.44091
TCN1	0.684712	0.0264349	0.44091
SCGB3A1	0.886417	0.0264444	0.44091
RNU5B-1	-0.711899	0.0265299	0.441768
TNFSF9	0.508865	0.0266856	0.443469
TPBGL	0.56513	0.0267503	0.443469
ACE2	0.460704	0.0268531	0.444324
RNU1-13P	-0.634407	0.0268767	0.444324
KRT15	-0.593665	0.0268982	0.444324
FABP6	-0.544061	0.0269054	0.444324
RNU5E-1	-0.71347	0.0269541	0.444563
AC005224.3	0.567126	0.0270044	0.444678
SYT4	-0.922963	0.027009	0.444678
SCUBE3	0.536251	0.0270124	0.444678
SEPTIN3	-0.46497	0.0270879	0.445077
5_8S_rRNA	0.867681	0.0271455	0.445742
PTPRT	-0.658577	0.0272036	0.446078
NLRP5	0.703244	0.0273299	0.446078
LINC02257	-0.657122	0.0273604	0.446078
CHGA	0.896496	0.0273718	0.446078
AF124730.1	0.59454	0.0274115	0.446439
TNFAIP8L3	0.487936	0.0274686	0.446439
DIO2	0.494444	0.0274952	0.446439
GABRA3	0.860902	0.0275255	0.446439
AL139280.1	0.679392	0.0275329	0.446439
MT-TL1	-0.489689	0.0275415	0.446439
SNORA70B	-0.559716	0.0280022	0.450934
IL17C	0.595705	0.0281357	0.452293
HOXD4	-0.593512	0.0282215	0.452553
TMEM179	-0.759432	0.0282215	0.452553
CYP17A1	0.644916	0.0282433	0.452623
AC012213.4	-0.671968	0.0283515	0.453166
ATP4B	0.694589	0.0284602	0.453863
STUM	-0.499004	0.0284937	0.454119
IGHV3-35	0.622161	0.0285816	0.455227
TRIM29	-0.516492	0.0287864	0.455454
UPK1A-AS1	0.737	0.028868	0.455677
KIR2DS4	0.624528	0.0288718	0.455677
AP003071.3	0.610355	0.0288718	0.455677
ZNF626	-0.501476	0.0291228	0.458472
FRMPD1	0.77493	0.0291417	0.458472
NKX1-2	0.70934	0.0292674	0.459412
CAMK1G	0.475659	0.0292966	0.459592
AP001000.1	-0.529307	0.0293646	0.460382
MYCNOS	-0.530809	0.0294358	0.460942
GATA5	0.776874	0.0295061	0.461381
MIR10B	-0.644868	0.0295436	0.461381
RNA5SP414	-0.684032	0.0296912	0.462713
RNA5SP389	-1.09619	0.029711	0.462744
LINC02761	-0.48195	0.0298568	0.464037
MIR200C	-0.595575	0.0298773	0.464037
NSG2	0.954544	0.0298995	0.464037
RNU5A-1	-0.661269	0.029901	0.464037
IGHD3-10	1.02661	0.0300983	0.465146
SLC16A11	0.55068	0.030102	0.465146
RN7SL180P	0.6733	0.0303684	0.467218
MUC6	-0.826946	0.030391	0.467218
C3	0.482038	0.0304011	0.467218
HHIP	-0.495649	0.030423	0.467218
HIST1H4L	-0.63574	0.0304294	0.467218
OSR1	0.655774	0.0306872	0.470067
VCX3B	0.684132	0.0307955	0.471171
RNA5SP277	-0.885526	0.0308232	0.471318
IGHV1-17	0.683247	0.0308596	0.471433
SNORA28	-0.538004	0.0309317	0.471687
S100A1	-0.604675	0.0309502	0.471687
YTHDF2P1	-0.569115	0.0309743	0.471687
VPREB3	-0.525049	0.0310057	0.471888
HAND2-AS1	0.59121	0.0310913	0.472638
KIRREL3	-0.584445	0.0311191	0.472755
AC073439.1	-0.498384	0.031246	0.474078
NPPC	0.662497	0.0312589	0.474078
MIR6867	-0.573268	0.0314136	0.476093
RNA5SP77	-0.824254	0.0317756	0.477822
AL024497.1	0.766497	0.0318443	0.477822
RNA5SP149	-0.872275	0.0320397	0.479213
RNA5SP519	-0.909985	0.0321055	0.479646
SNORA80E	-0.556692	0.0321584	0.479664
JCHAIN	0.540008	0.0322518	0.480177
MKRN3	-0.594079	0.0323876	0.481373
OR7E161P	-0.584887	0.0325342	0.482662
RPRM	0.581379	0.0325405	0.482662
AC140076.1	-0.459626	0.0325414	0.482662
ECRG4	-0.587109	0.0326555	0.483275
IGHV3-52	0.612804	0.0327014	0.483275
TMEM163	0.48975	0.0327851	0.483962
IGKV1D-12	0.715065	0.0328415	0.484244
CYTL1	0.59851	0.0328601	0.484244
AC074135.1	-0.524512	0.0329588	0.485149
AC092828.1	0.656339	0.0330387	0.485226
AC004034.1	-0.533047	0.0331356	0.485553
AC021242.3	-0.523362	0.0333274	0.486652
AL603914.1	0.669364	0.0335341	0.487819
IGHV3-48	0.675094	0.0336866	0.489226
VCX3A	0.721592	0.0336929	0.489226
GSDMC	0.567439	0.033706	0.489226
GAP43	-0.643364	0.0338061	0.489495
MIR3177	-0.635503	0.0338119	0.489495
CSAG1	0.863944	0.0338209	0.489495
MT1A	0.56862	0.0338234	0.489495
IGLV3-19	-0.630966	0.033911	0.489783
TNFRSF11B	0.599255	0.033942	0.489783
AL022313.2	-0.484679	0.0340067	0.489852
IGLON5	0.598341	0.0340141	0.489852
SCGB1D1	-1.01783	0.034119	0.490296
CACNG6	-0.623179	0.0342664	0.491209
LINC01605	-0.52384	0.0342885	0.491209
IL6	0.503895	0.0343512	0.491299
APLP1	-0.490155	0.0344032	0.491363
NEFM	0.643615	0.0344199	0.491363
RNA5SP23	-1.13519	0.0344626	0.491702
KRTDAP	0.601271	0.0346248	0.493141
AC025884.1	-0.565078	0.034677	0.493141
PLAC9P1	0.604553	0.0349458	0.493721
PTH1R	0.516328	0.035071	0.494416
PVALB	-0.558235	0.0352681	0.495869
AC004264.1	0.481737	0.0353147	0.495869
IGHGP	-0.677969	0.0353467	0.495869
PKNOX2	-0.553547	0.0354123	0.495869
AC093001.1	-0.589018	0.0354963	0.496466
EEF1GP1	-0.513785	0.035621	0.496466
AC116562.3	-0.650811	0.0358332	0.498027
MAP7D2	-0.495757	0.0359728	0.499407
HOXC13	-0.759092	0.0359819	0.499407
PNMA2	-0.619789	0.0361804	0.501198
VAX1	-0.675455	0.0364753	0.503569
AC093063.1	0.578955	0.0365453	0.504028
TRAV21	0.472724	0.0365836	0.504028
TENM3	-0.535769	0.0366369	0.504028
PPIAP77	-0.589046	0.0366443	0.504028
EPHA7	-0.50991	0.0367476	0.505183
NKAIN4	0.564102	0.0368929	0.506208
IGLV2-5	0.690652	0.0369069	0.506208
MZB1	-0.514684	0.0369484	0.506208
CRYM	0.558708	0.0370255	0.506208
ANKRD2	-0.593221	0.0370256	0.506208
UGT2B4	-0.682593	0.0371127	0.506208
PRAMENP	0.736502	0.0371969	0.506606
CLDN6	0.80924	0.0375061	0.508091
RNA5SP355	-1.65419	0.0375486	0.508401
AL451137.2	-0.552033	0.0377077	0.509435
RNA5SP143	-0.912213	0.0377586	0.509435
STRA8	-0.597767	0.0378046	0.509435
CT83	0.99824	0.0378501	0.509435
CKS1BP1	0.493929	0.0379693	0.510389
DIO3OS	0.558634	0.0379701	0.510389
PRSS50	-0.607362	0.0380615	0.510792
GLDC	-0.518098	0.0382308	0.51142
SNORD105B	-0.605052	0.0382397	0.51142
VSNL1	0.561397	0.038305	0.511965
MT1B	0.612848	0.03863	0.513527
APOH	0.702605	0.0388774	0.514869
POSTN	-0.469384	0.0389629	0.515167
IGLV2-18	0.653447	0.0389683	0.515167
NR5A1	-1.06001	0.0389792	0.515167
BMP4	0.598596	0.0390484	0.515819
SNHG28	0.507249	0.0390991	0.515931
KRT40	0.642804	0.0391163	0.515931
RPL35AP4	-0.516744	0.0391563	0.516196
TRBV6-6	-0.512499	0.0391942	0.516435
AC092343.1	0.779512	0.0392537	0.516901
IGLL5	-0.567829	0.0393115	0.516932
RNA5SP415	-0.727137	0.0394448	0.518049
SCGB2A1	0.506815	0.0395344	0.518552
SNORD116-23	-0.61862	0.039702	0.519076
COX7B2	-0.937954	0.0397311	0.519076
IGHD2-15	1.02136	0.0397823	0.519076
SLC17A8	0.641916	0.0399983	0.520447
SNORD116-24	-0.50058	0.0400062	0.520447
TRBV13	0.595978	0.0400688	0.520834
PIPOX	-0.508782	0.040268	0.522902
RNU6-882P	-0.480544	0.0403326	0.523217
FGFBP1	0.586991	0.0406346	0.52538
AP003064.2	0.579888	0.040681	0.52538
TLX1	-0.861887	0.0406811	0.52538
DUOX1	0.481825	0.0407691	0.525601
AL627402.1	-0.572691	0.0408041	0.525663
CLCNKA	-0.478644	0.0409049	0.52644
LINC02683	-0.55374	0.0410089	0.527081
CCN5	0.567195	0.0413547	0.529869
RAPSN	0.609187	0.0413655	0.529869
TPSD1	0.640734	0.0414316	0.529869
IGLVI-20	0.73023	0.0414416	0.529869
IGHV3OR16-13	-0.63124	0.0414669	0.529869
TDRD12	-0.753581	0.0417018	0.529869
MIR1915HG	0.598318	0.0417559	0.529869
TRABD2A	0.537234	0.0417611	0.529869
IGKV2D-24	0.672873	0.0417813	0.529869
KRT38	-0.671883	0.04197	0.531211
TBCAP1	-0.497692	0.042007	0.531421
PF4	0.601048	0.0421638	0.532111
LINC02308	-0.557479	0.0421983	0.532286
IL1RL1	0.580133	0.0423395	0.532905
P2RY14	0.465585	0.0425596	0.534142
PCSK1	-0.71567	0.042602	0.534271
SPRR2E	-0.966139	0.0426673	0.534831
AQP6	0.464502	0.0428189	0.535221
NXPH3	0.488154	0.0429618	0.535701
CST4	0.912793	0.0429945	0.535701
CDH10	-0.617171	0.0430662	0.535887
THRSP	-0.662084	0.0431017	0.535887
AC022098.3	-0.572951	0.0434898	0.537373
GSTA2	0.651198	0.0435442	0.537534
TCF23	0.595821	0.0437469	0.538228
SCN3A	-0.630638	0.0437659	0.538228
C16orf89	-0.674868	0.043855	0.538512
IGHV3-41	-0.615345	0.0438718	0.538512
MTUS2	0.643826	0.0440357	0.538871
AC011313.1	-0.606119	0.0440392	0.538871
MTCL1	0.489497	0.0440461	0.538871
AP000757.2	-0.687897	0.0440917	0.539175
AC148476.1	-0.544522	0.0441363	0.539314
LY6H	0.58734	0.0441908	0.539564
ACTA1	0.486582	0.0442991	0.539681
RWDD4P2	-0.525692	0.0446853	0.541513
RNA5SP194	-0.659085	0.0450029	0.543419
CPS1	-0.557506	0.0451312	0.544464
MIR6891	0.542301	0.0454081	0.54533
LTK	-0.460419	0.0455293	0.545974
EEF1A2	0.880557	0.0455696	0.546206
GJB2	0.455226	0.0457028	0.547046
AL022718.1	0.564919	0.0461491	0.550344
FOXC2	0.555301	0.046234	0.550617
RNA5SP119	-0.768965	0.0462749	0.550851
LINC01781	0.495391	0.0467938	0.552618
NAT8	0.578842	0.0469357	0.552897
AC104695.4	0.468795	0.0470402	0.553376
AC012671.1	-0.552217	0.0470838	0.553639
CEACAM6	0.619337	0.0471734	0.554043
NCCRP1	0.562603	0.0473238	0.554956
USH1G	-0.540089	0.0473872	0.555058
AC069152.1	-0.563348	0.0474006	0.555058
PTGES3P3	-0.484419	0.0474712	0.555058
TGM6	0.67625	0.0475113	0.555058
AL355309.1	0.460965	0.0475692	0.555058
KRBOX1	-0.577943	0.0475757	0.555058
CACNA1B	-0.54534	0.0477043	0.555058
IGKV1OR22-5	0.676973	0.0477597	0.555311
SYT2	-0.507996	0.0480064	0.557182
AC008897.2	-0.523826	0.0480993	0.55769
RIPPLY3	0.484977	0.0483578	0.559696
RPL10L	-0.61479	0.0484824	0.559932
ACTA2-AS1	0.467713	0.0486605	0.560277
KANK4	-0.455681	0.0487097	0.560592
FAT2	-0.455795	0.0488001	0.561131
AC008514.1	0.550893	0.04919	0.564027
MS4A1	0.522449	0.0492882	0.564027
SHISA3	-0.587426	0.04929	0.564027
OLIG1	0.653667	0.0498869	0.566758
AC106875.1	-0.755218	0.0499243	0.566758
LINC02826	0.634799	0.0499758	0.566758
APCDD1	0.469077	0.0499855	0.566758
