# Supplementary material for: Screening and Identification of Prognostic Tumor-Infiltrating Immune Cells and Genes of Endometrioid Endometrial Adenocarcinoma: Based on The Cancer Genome Atlas Database and Bioinformatics
Source: Front Oncol. 2020 Dec 1;10:554214. doi: 10.3389/fonc.2020.554214 (PMC7737471; doi:10.3389/fonc.2020.554214)
Supplement: Supplementary file 8 [file Table_8.xlsx]

## Sheet: GO analysis in module 1
Table S8-1. GO enrichment analysis in module 1 by ClueGo
GOID	GOTerm	Ontology Source	Term PValue	Term PValue Corrected with Bonferroni step down	Group PValue	Group PValue Corrected with Bonferroni step down	GOLevels	GOGroups	% Associated Genes	Nr. Genes	Associated Genes Found
GO:0042923	neuropeptide binding	GO_MolecularFunction-EBI-UniProt-GOA_17.02.2020_00h00	2.11124e-07	7.17821e-06	1.19961e-05	1.19961e-05	[4]	Group0	16	4	[GALR2, OPRK1, SSTR1, SSTR5]
GO:0008188	neuropeptide receptor activity	GO_BiologicalProcess-EBI-UniProt-GOA_17.02.2020_00h00	0.000237288	0.00166102	1.19961e-05	1.19961e-05	[5, 6, 7, 8]	Group0	5.26316	3	[GALR2, SSTR1, SSTR5]
GO:0005788	endoplasmic reticulum lumen	GO_CellularComponent-EBI-UniProt-GOA_17.02.2020_00h00	3.99006e-25	2.23443e-23	5.58952e-20	2.79476e-19	[4, 5, 6]	Group1	5.31646	21	[AFP, AHSG, AMBN, AMTN, APOA1, APOA2, APOB, APOL1, BMP4, CHGB, CHRDL1, FGA, FGG, IGFBP1, IL6, ITIH2, SERPINA1, SERPIND1, SPARCL1, TF, VGF]
GO:0043687	post-translational protein modification	GO_BiologicalProcess-EBI-UniProt-GOA_17.02.2020_00h00	7.50323e-24	4.12678e-22	5.58952e-20	2.79476e-19	[6, 7]	Group1	4.62555	21	[AFP, AHSG, AMBN, AMTN, APOA1, APOA2, APOB, APOL1, BMP4, CHGB, CHRDL1, FGA, FGG, IGFBP1, IL6, ITIH2, SERPINA1, SERPIND1, SPARCL1, TF, VGF]
GO:0072562	blood microparticle	GO_CellularComponent-EBI-UniProt-GOA_17.02.2020_00h00	4.36784e-09	1.6161e-07	7.27481e-12	2.90992e-11	[2, 3, 4]	Group2	4.32432	8	[AHSG, APOA1, APOA2, APOL1, FGA, FGG, ITIH2, TF]
GO:1990777	lipoprotein particle	GO_CellularComponent-EBI-UniProt-GOA_17.02.2020_00h00	3.13516e-06	9.09197e-05	7.27481e-12	2.90992e-11	[3]	Group2	8.33333	4	[APOA1, APOA2, APOB, APOL1]
GO:0034358	plasma lipoprotein particle	GO_CellularComponent-EBI-UniProt-GOA_17.02.2020_00h00	3.13516e-06	9.09197e-05	7.27481e-12	2.90992e-11	[3, 4]	Group2	8.33333	4	[APOA1, APOA2, APOB, APOL1]
GO:0034364	high-density lipoprotein particle	GO_CellularComponent-EBI-UniProt-GOA_17.02.2020_00h00	8.60597e-07	2.66785e-05	7.27481e-12	2.90992e-11	[4, 5]	Group2	11.4286	4	[APOA1, APOA2, APOB, APOL1]
GO:0034385	triglyceride-rich plasma lipoprotein particle	GO_CellularComponent-EBI-UniProt-GOA_17.02.2020_00h00	2.92008e-07	9.63626e-06	7.27481e-12	2.90992e-11	[4, 5]	Group2	14.8148	4	[APOA1, APOA2, APOB, APOL1]
GO:0034114	regulation of heterotypic cell-cell adhesion	GO_BiologicalProcess-EBI-UniProt-GOA_17.02.2020_00h00	5.97176e-05	0.000895765	7.27481e-12	2.90992e-11	[5]	Group2	8.33333	3	[APOA1, FGA, FGG]
GO:0034361	very-low-density lipoprotein particle	GO_CellularComponent-EBI-UniProt-GOA_17.02.2020_00h00	2.92008e-07	9.63626e-06	7.27481e-12	2.90992e-11	[5, 6]	Group2	14.8148	4	[APOA1, APOA2, APOB, APOL1]
GO:1900024	regulation of substrate adhesion-dependent cell spreading	GO_BiologicalProcess-EBI-UniProt-GOA_17.02.2020_00h00	0.000399912	0.00119974	7.27481e-12	2.90992e-11	[5, 7]	Group2	4.41176	3	[APOA1, FGA, FGG]
GO:0031091	platelet alpha granule	GO_CellularComponent-EBI-UniProt-GOA_17.02.2020_00h00	4.94197e-09	1.77911e-07	7.27481e-12	2.90992e-11	[4, 6, 7, 8, 9]	Group2	5.9322	7	[AHSG, FGA, FGG, IGFBP1, IL6, PF4, SERPINA1]
GO:0002576	platelet degranulation	GO_BiologicalProcess-EBI-UniProt-GOA_17.02.2020_00h00	8.12298e-11	3.16796e-09	7.27481e-12	2.90992e-11	[6, 7, 8]	Group2	5.20231	9	[AHSG, APOA1, FGA, FGG, IGFBP1, IL6, PF4, SERPINA1, TF]
GO:1900026	positive regulation of substrate adhesion-dependent cell spreading	GO_BiologicalProcess-EBI-UniProt-GOA_17.02.2020_00h00	0.000180544	0.00180544	7.27481e-12	2.90992e-11	[6, 7, 8]	Group2	5.76923	3	[APOA1, FGA, FGG]
GO:0031093	platelet alpha granule lumen	GO_CellularComponent-EBI-UniProt-GOA_17.02.2020_00h00	6.23313e-10	2.36859e-08	7.27481e-12	2.90992e-11	[5, 6, 7, 8, 9, 10]	Group2	7.95455	7	[AHSG, FGA, FGG, IGFBP1, IL6, PF4, SERPINA1]
GO:2001237	negative regulation of extrinsic apoptotic signaling pathway	GO_BiologicalProcess-EBI-UniProt-GOA_17.02.2020_00h00	5.08374e-07	1.6268e-05	7.27481e-12	2.90992e-11	[7, 8, 9]	Group2	4.22535	6	[BMP4, FGA, FGG, IGFBP1, IL6, PF4]
GO:1902042	negative regulation of extrinsic apoptotic signaling pathway via death domain receptors	GO_BiologicalProcess-EBI-UniProt-GOA_17.02.2020_00h00	0.00020204	0.00181836	7.27481e-12	2.90992e-11	[8, 9, 10]	Group2	5.55556	3	[FGA, FGG, IL6]
GO:0034381	plasma lipoprotein particle clearance	GO_BiologicalProcess-EBI-UniProt-GOA_17.02.2020_00h00	0.000262863	0.00157718	7.84693e-11	2.35408e-10	[2, 4]	Group3	5.08475	3	[APOA1, APOA2, APOB]
GO:0072562	blood microparticle	GO_CellularComponent-EBI-UniProt-GOA_17.02.2020_00h00	4.36784e-09	1.6161e-07	7.84693e-11	2.35408e-10	[2, 3, 4]	Group3	4.32432	8	[AHSG, APOA1, APOA2, APOL1, FGA, FGG, ITIH2, TF]
GO:1990777	lipoprotein particle	GO_CellularComponent-EBI-UniProt-GOA_17.02.2020_00h00	3.13516e-06	9.09197e-05	7.84693e-11	2.35408e-10	[3]	Group3	8.33333	4	[APOA1, APOA2, APOB, APOL1]
GO:0034358	plasma lipoprotein particle	GO_CellularComponent-EBI-UniProt-GOA_17.02.2020_00h00	3.13516e-06	9.09197e-05	7.84693e-11	2.35408e-10	[3, 4]	Group3	8.33333	4	[APOA1, APOA2, APOB, APOL1]
GO:0071827	plasma lipoprotein particle organization	GO_BiologicalProcess-EBI-UniProt-GOA_17.02.2020_00h00	0.000417477	0.000834954	7.84693e-11	2.35408e-10	[2, 5]	Group3	4.34783	3	[APOA1, APOA2, APOB]
GO:0034367	protein-containing complex remodeling	GO_BiologicalProcess-EBI-UniProt-GOA_17.02.2020_00h00	8.21499e-05	0.00106795	7.84693e-11	2.35408e-10	[4]	Group3	7.5	3	[APOA1, APOA2, APOB]
GO:0070325	lipoprotein particle receptor binding	GO_MolecularFunction-EBI-UniProt-GOA_17.02.2020_00h00	8.21499e-05	0.00106795	7.84693e-11	2.35408e-10	[4]	Group3	7.5	3	[APOA1, APOA2, APOB]
GO:0071825	protein-lipid complex subunit organization	GO_BiologicalProcess-EBI-UniProt-GOA_17.02.2020_00h00	0.000492679	0.000492679	7.84693e-11	2.35408e-10	[4]	Group3	4.10959	3	[APOA1, APOA2, APOB]
GO:0034369	plasma lipoprotein particle remodeling	GO_BiologicalProcess-EBI-UniProt-GOA_17.02.2020_00h00	7.61005e-05	0.00106541	7.84693e-11	2.35408e-10	[3, 4, 6]	Group3	7.69231	3	[APOA1, APOA2, APOB]
GO:0034377	plasma lipoprotein particle assembly	GO_BiologicalProcess-EBI-UniProt-GOA_17.02.2020_00h00	0.000109475	0.0013137	7.84693e-11	2.35408e-10	[3, 4, 6]	Group3	6.81818	3	[APOA1, APOA2, APOB]
GO:0034364	high-density lipoprotein particle	GO_CellularComponent-EBI-UniProt-GOA_17.02.2020_00h00	8.60597e-07	2.66785e-05	7.84693e-11	2.35408e-10	[4, 5]	Group3	11.4286	4	[APOA1, APOA2, APOB, APOL1]
GO:0034385	triglyceride-rich plasma lipoprotein particle	GO_CellularComponent-EBI-UniProt-GOA_17.02.2020_00h00	2.92008e-07	9.63626e-06	7.84693e-11	2.35408e-10	[4, 5]	Group3	14.8148	4	[APOA1, APOA2, APOB, APOL1]
GO:0042627	chylomicron	GO_CellularComponent-EBI-UniProt-GOA_17.02.2020_00h00	8.30979e-06	0.000191125	7.84693e-11	2.35408e-10	[4, 5]	Group3	15.7895	3	[APOA1, APOA2, APOB]
GO:0034368	protein-lipid complex remodeling	GO_BiologicalProcess-EBI-UniProt-GOA_17.02.2020_00h00	7.61005e-05	0.00106541	7.84693e-11	2.35408e-10	[5]	Group3	7.69231	3	[APOA1, APOA2, APOB]
GO:0044058	regulation of digestive system process	GO_BiologicalProcess-EBI-UniProt-GOA_17.02.2020_00h00	4.00806e-06	0.000108218	7.84693e-11	2.35408e-10	[5]	Group3	7.84314	4	[APOA1, APOA2, OPRK1, PTGER3]
GO:0065005	protein-lipid complex assembly	GO_BiologicalProcess-EBI-UniProt-GOA_17.02.2020_00h00	0.000142131	0.00156344	7.84693e-11	2.35408e-10	[5]	Group3	6.25	3	[APOA1, APOA2, APOB]
GO:0034370	triglyceride-rich lipoprotein particle remodeling	GO_BiologicalProcess-EBI-UniProt-GOA_17.02.2020_00h00	8.30979e-06	0.000191125	7.84693e-11	2.35408e-10	[4, 5, 7]	Group3	15.7895	3	[APOA1, APOA2, APOB]
GO:0034378	chylomicron assembly	GO_BiologicalProcess-EBI-UniProt-GOA_17.02.2020_00h00	7.00803e-06	0.000175201	7.84693e-11	2.35408e-10	[4, 5, 7]	Group3	16.6667	3	[APOA1, APOA2, APOB]
GO:0034361	very-low-density lipoprotein particle	GO_CellularComponent-EBI-UniProt-GOA_17.02.2020_00h00	2.92008e-07	9.63626e-06	7.84693e-11	2.35408e-10	[5, 6]	Group3	14.8148	4	[APOA1, APOA2, APOB, APOL1]
GO:0034371	chylomicron remodeling	GO_BiologicalProcess-EBI-UniProt-GOA_17.02.2020_00h00	3.92496e-06	0.000109899	7.84693e-11	2.35408e-10	[5, 6, 8]	Group3	20	3	[APOA1, APOA2, APOB]
GO:0015248	sterol transporter activity	GO_BiologicalProcess-EBI-UniProt-GOA_17.02.2020_00h00	7.61005e-05	0.00106541	7.84693e-11	2.35408e-10	[6, 7]	Group3	7.69231	3	[APOA1, APOA2, APOB]
GO:0120013	lipid transfer activity	GO_BiologicalProcess-EBI-UniProt-GOA_17.02.2020_00h00	0.00020204	0.00181836	7.84693e-11	2.35408e-10	[6, 7]	Group3	5.55556	3	[APOA1, APOA2, APOB]
GO:0018206	peptidyl-methionine modification	GO_BiologicalProcess-EBI-UniProt-GOA_17.02.2020_00h00	2.47902e-05	0.000471013	7.84693e-11	2.35408e-10	[7, 8]	Group3	11.1111	3	[APOA1, APOA2, CXCL8]
GO:0033344	cholesterol efflux	GO_BiologicalProcess-EBI-UniProt-GOA_17.02.2020_00h00	5.48217e-05	0.000877148	7.84693e-11	2.35408e-10	[7, 8]	Group3	8.57143	3	[APOA1, APOA2, APOB]
GO:0120015	sterol transfer activity	GO_BiologicalProcess-EBI-UniProt-GOA_17.02.2020_00h00	1.95506e-05	0.000391011	7.84693e-11	2.35408e-10	[7, 8]	Group3	12	3	[APOA1, APOA2, APOB]
GO:0120020	cholesterol transfer activity	GO_BiologicalProcess-EBI-UniProt-GOA_17.02.2020_00h00	1.72298e-05	0.000361827	7.84693e-11	2.35408e-10	[8, 9]	Group3	12.5	3	[APOA1, APOA2, APOB]
GO:0019730	antimicrobial humoral response	GO_BiologicalProcess-EBI-UniProt-GOA_17.02.2020_00h00	5.03083e-11	2.06264e-09	6.28944e-10	1.25789e-09	[3, 4, 5]	Group4	5.4878	9	[CXCL11, CXCL13, CXCL2, CXCL3, CXCL5, CXCL6, CXCL8, FGA, PF4]
GO:0060326	cell chemotaxis	GO_BiologicalProcess-EBI-UniProt-GOA_17.02.2020_00h00	4.53273e-13	1.90375e-11	6.28944e-10	1.25789e-09	[4, 5]	Group4	4.21053	12	[CCL20, CCL21, CXCL11, CXCL12, CXCL13, CXCL2, CXCL3, CXCL5, CXCL6, CXCL8, IL6, PF4]
GO:0030595	leukocyte chemotaxis	GO_BiologicalProcess-EBI-UniProt-GOA_17.02.2020_00h00	1.69409e-13	7.28457e-12	6.28944e-10	1.25789e-09	[3, 5, 6]	Group4	5.72917	11	[CCL20, CCL21, CXCL11, CXCL13, CXCL2, CXCL3, CXCL5, CXCL6, CXCL8, IL6, PF4]
GO:0071674	mononuclear cell migration	GO_BiologicalProcess-EBI-UniProt-GOA_17.02.2020_00h00	0.000290157	0.00145078	6.28944e-10	1.25789e-09	[3, 5, 6]	Group4	4.91803	3	[CCL20, CCL21, IL6]
GO:0072676	lymphocyte migration	GO_BiologicalProcess-EBI-UniProt-GOA_17.02.2020_00h00	4.97374e-05	0.000845536	6.28944e-10	1.25789e-09	[3, 5, 6]	Group4	4.16667	4	[CCL20, CCL21, CXCL11, CXCL13]
GO:0097529	myeloid leukocyte migration	GO_BiologicalProcess-EBI-UniProt-GOA_17.02.2020_00h00	3.16694e-14	1.42512e-12	6.28944e-10	1.25789e-09	[3, 5, 6]	Group4	6.66667	11	[CCL20, CCL21, CXCL11, CXCL13, CXCL2, CXCL3, CXCL5, CXCL6, CXCL8, IL6, PF4]
GO:0042379	chemokine receptor binding	GO_MolecularFunction-EBI-UniProt-GOA_17.02.2020_00h00	5.50638e-17	2.86332e-15	6.28944e-10	1.25789e-09	[5]	Group4	11.7021	11	[CCL20, CCL21, CXCL11, CXCL12, CXCL13, CXCL2, CXCL3, CXCL5, CXCL6, CXCL8, PF4]
GO:0061844	antimicrobial humoral immune response mediated by antimicrobial peptide	GO_BiologicalProcess-EBI-UniProt-GOA_17.02.2020_00h00	5.49498e-11	2.19799e-09	6.28944e-10	1.25789e-09	[4, 5, 6]	Group4	7.47664	8	[CXCL11, CXCL13, CXCL2, CXCL3, CXCL5, CXCL6, CXCL8, PF4]
GO:1990868	response to chemokine	GO_BiologicalProcess-EBI-UniProt-GOA_17.02.2020_00h00	4.98649e-16	2.49325e-14	6.28944e-10	1.25789e-09	[5]	Group4	9.64912	11	[CCL20, CCL21, CXCL11, CXCL12, CXCL13, CXCL2, CXCL3, CXCL5, CXCL6, CXCL8, PF4]
GO:0005125	cytokine activity	GO_BiologicalProcess-EBI-UniProt-GOA_17.02.2020_00h00	8.75572e-15	4.2903e-13	6.28944e-10	1.25789e-09	[4, 5, 6, 7]	Group4	4.74453	13	[BMP4, CCL20, CCL21, CXCL11, CXCL12, CXCL13, CXCL2, CXCL3, CXCL5, CXCL6, CXCL8, IL6, PF4]
GO:0002548	monocyte chemotaxis	GO_BiologicalProcess-EBI-UniProt-GOA_17.02.2020_00h00	0.000213382	0.00170706	6.28944e-10	1.25789e-09	[4, 6, 7]	Group4	5.45455	3	[CCL20, CCL21, IL6]
GO:0048247	lymphocyte chemotaxis	GO_BiologicalProcess-EBI-UniProt-GOA_17.02.2020_00h00	1.06288e-05	0.000233833	6.28944e-10	1.25789e-09	[4, 6, 7]	Group4	6.15385	4	[CCL20, CCL21, CXCL11, CXCL13]
GO:0097530	granulocyte migration	GO_BiologicalProcess-EBI-UniProt-GOA_17.02.2020_00h00	9.81904e-14	4.32038e-12	6.28944e-10	1.25789e-09	[4, 6, 7]	Group4	7.87402	10	[CCL20, CCL21, CXCL11, CXCL13, CXCL2, CXCL3, CXCL5, CXCL6, CXCL8, PF4]
GO:0045236	CXCR chemokine receptor binding	GO_MolecularFunction-EBI-UniProt-GOA_17.02.2020_00h00	6.69367e-19	3.61458e-17	6.28944e-10	1.25789e-09	[6]	Group4	36	9	[CXCL11, CXCL12, CXCL13, CXCL2, CXCL3, CXCL5, CXCL6, CXCL8, PF4]
GO:0048020	CCR chemokine receptor binding	GO_MolecularFunction-EBI-UniProt-GOA_17.02.2020_00h00	0.000290157	0.00145078	6.28944e-10	1.25789e-09	[6]	Group4	4.91803	3	[CCL20, CCL21, CXCL13]
GO:0070098	chemokine-mediated signaling pathway	GO_BiologicalProcess-EBI-UniProt-GOA_17.02.2020_00h00	1.75349e-16	8.94282e-15	6.28944e-10	1.25789e-09	[5, 6, 7]	Group4	10.5769	11	[CCL20, CCL21, CXCL11, CXCL12, CXCL13, CXCL2, CXCL3, CXCL5, CXCL6, CXCL8, PF4]
GO:0071621	granulocyte chemotaxis	GO_BiologicalProcess-EBI-UniProt-GOA_17.02.2020_00h00	2.97593e-14	1.36893e-12	6.28944e-10	1.25789e-09	[4, 5, 6, 7, 8]	Group4	8.84956	10	[CCL20, CCL21, CXCL11, CXCL13, CXCL2, CXCL3, CXCL5, CXCL6, CXCL8, PF4]
GO:1990869	cellular response to chemokine	GO_BiologicalProcess-EBI-UniProt-GOA_17.02.2020_00h00	4.98649e-16	2.49325e-14	6.28944e-10	1.25789e-09	[6]	Group4	9.64912	11	[CCL20, CCL21, CXCL11, CXCL12, CXCL13, CXCL2, CXCL3, CXCL5, CXCL6, CXCL8, PF4]
GO:0008009	chemokine activity	GO_BiologicalProcess-EBI-UniProt-GOA_17.02.2020_00h00	7.44193e-19	3.94422e-17	6.28944e-10	1.25789e-09	[5, 6, 7, 8]	Group4	16.9231	11	[CCL20, CCL21, CXCL11, CXCL12, CXCL13, CXCL2, CXCL3, CXCL5, CXCL6, CXCL8, PF4]
GO:1990266	neutrophil migration	GO_BiologicalProcess-EBI-UniProt-GOA_17.02.2020_00h00	2.47766e-14	1.1645e-12	6.28944e-10	1.25789e-09	[5, 7, 8]	Group4	9.00901	10	[CCL20, CCL21, CXCL11, CXCL13, CXCL2, CXCL3, CXCL5, CXCL6, CXCL8, PF4]
GO:2000401	regulation of lymphocyte migration	GO_BiologicalProcess-EBI-UniProt-GOA_17.02.2020_00h00	2.94238e-05	0.000529628	6.28944e-10	1.25789e-09	[5, 7, 8]	Group4	4.7619	4	[CCL20, CCL21, CXCL12, CXCL13]
GO:0030593	neutrophil chemotaxis	GO_BiologicalProcess-EBI-UniProt-GOA_17.02.2020_00h00	1.14749e-14	5.50796e-13	6.28944e-10	1.25789e-09	[5, 6, 7, 8, 9]	Group4	9.70874	10	[CCL20, CCL21, CXCL11, CXCL13, CXCL2, CXCL3, CXCL5, CXCL6, CXCL8, PF4]
GO:0048248	CXCR3 chemokine receptor binding	GO_MolecularFunction-EBI-UniProt-GOA_17.02.2020_00h00	1.74828e-07	6.11897e-06	6.28944e-10	1.25789e-09	[7]	Group4	50	3	[CXCL11, CXCL13, PF4]
GO:0002690	positive regulation of leukocyte chemotaxis	GO_BiologicalProcess-EBI-UniProt-GOA_17.02.2020_00h00	5.0438e-06	0.000131139	6.28944e-10	1.25789e-09	[6, 7, 8, 9]	Group4	4.20168	5	[CCL21, CXCL12, CXCL13, CXCL8, IL6]
GO:2000403	positive regulation of lymphocyte migration	GO_BiologicalProcess-EBI-UniProt-GOA_17.02.2020_00h00	4.00806e-06	0.000108218	6.28944e-10	1.25789e-09	[6, 8, 9]	Group4	7.84314	4	[CCL20, CCL21, CXCL12, CXCL13]
GO:2000404	regulation of T cell migration	GO_BiologicalProcess-EBI-UniProt-GOA_17.02.2020_00h00	7.71409e-06	0.000185138	6.28944e-10	1.25789e-09	[6, 8, 9]	Group4	6.66667	4	[CCL20, CCL21, CXCL12, CXCL13]
GO:2000107	negative regulation of leukocyte apoptotic process	GO_BiologicalProcess-EBI-UniProt-GOA_17.02.2020_00h00	0.000350093	0.00140037	6.28944e-10	1.25789e-09	[8]	Group4	4.61538	3	[BMP4, CCL21, CXCL12]
GO:2000406	positive regulation of T cell migration	GO_BiologicalProcess-EBI-UniProt-GOA_17.02.2020_00h00	1.64928e-06	4.94783e-05	6.28944e-10	1.25789e-09	[7, 9, 10]	Group4	9.7561	4	[CCL20, CCL21, CXCL12, CXCL13]

## Sheet: GO analysis in module 2
Table S8-2. GO enrichment analysis in module 2 by ClueGo	GOTerm	Ontology Source	Term PValue	Term PValue Corrected with Bonferroni step down	Group PValue	Group PValue Corrected with Bonferroni step down	GOLevels	GOGroups	% Associated Genes	Nr. Genes	Associated Genes Found
GOID	GOTerm	Ontology Source	Term PValue	Term PValue Corrected with Bonferroni step down	Group PValue	Group PValue Corrected with Bonferroni step down	GOLevels	GOGroups	% Associated Genes	Nr. Genes	Associated Genes Found
GO:0045095	keratin filament	GO_CellularComponent-EBI-UniProt-GOA_17.02.2020_00h00	1.50914e-10	2.11279e-09	1.50914e-10	6.03655e-10	[7, 8]	Group0	6.79612	7	[KRT1, KRT14, KRT4, KRT71, KRT72, KRT79, KRT85]
GO:0045104	intermediate filament cytoskeleton organization	GO_BiologicalProcess-EBI-UniProt-GOA_17.02.2020_00h00	0.000105342	0.000210683	0.000105342	0.000210683	[3, 5]	Group1	4.91803	3	[KRT14, KRT20, KRT71]
GO:0045109	intermediate filament organization	GO_BiologicalProcess-EBI-UniProt-GOA_17.02.2020_00h00	1.10495e-05	5.52474e-05	0.000105342	0.000210683	[4, 6]	Group1	10.3448	3	[KRT14, KRT20, KRT71]
GO:0071674	mononuclear cell migration	GO_BiologicalProcess-EBI-UniProt-GOA_17.02.2020_00h00	0.000105342	0.000210683	0.000954629	0.000954629	[3, 5, 6]	Group2	4.91803	3	[CCL17, CCL2, CCL22]
GO:0002548	monocyte chemotaxis	GO_BiologicalProcess-EBI-UniProt-GOA_17.02.2020_00h00	7.72595e-05	0.000231779	0.000954629	0.000954629	[4, 6, 7]	Group2	5.45455	3	[CCL17, CCL2, CCL22]
GO:0048247	lymphocyte chemotaxis	GO_BiologicalProcess-EBI-UniProt-GOA_17.02.2020_00h00	0.00012733	0.00012733	0.000954629	0.000954629	[4, 6, 7]	Group2	4.61538	3	[CCL17, CCL2, CCL22]
GO:0048020	CCR chemokine receptor binding	GO_MolecularFunction-EBI-UniProt-GOA_17.02.2020_00h00	0.000105342	0.000210683	0.000954629	0.000954629	[6]	Group2	4.91803	3	[CCL17, CCL2, CCL22]
GO:0008009	chemokine activity	GO_BiologicalProcess-EBI-UniProt-GOA_17.02.2020_00h00	0.00012733	0.00012733	0.000954629	0.000954629	[5, 6, 7, 8]	Group2	4.61538	3	[CCL17, CCL2, CCL22]
GO:0009913	epidermal cell differentiation	GO_BiologicalProcess-EBI-UniProt-GOA_17.02.2020_00h00	7.63869e-19	1.1458e-17	5.81657e-17	2.90829e-16	[5, 6]	Group3	4.13223	15	[KRT1, KRT14, KRT15, KRT20, KRT24, KRT27, KRT28, KRT38, KRT39, KRT4, KRT40, KRT71, KRT72, KRT79, KRT85]
GO:0045111	intermediate filament cytoskeleton	GO_CellularComponent-EBI-UniProt-GOA_17.02.2020_00h00	1.43108e-20	2.43283e-19	5.81657e-17	2.90829e-16	[5, 6]	Group3	5.37634	15	[KRT1, KRT14, KRT15, KRT20, KRT24, KRT27, KRT28, KRT38, KRT39, KRT4, KRT40, KRT71, KRT72, KRT79, KRT85]
GO:0031424	keratinization	GO_BiologicalProcess-EBI-UniProt-GOA_17.02.2020_00h00	1.35389e-21	2.437e-20	5.81657e-17	2.90829e-16	[2, 6, 7, 8]	Group3	6.27615	15	[KRT1, KRT14, KRT15, KRT20, KRT24, KRT27, KRT28, KRT38, KRT39, KRT4, KRT40, KRT71, KRT72, KRT79, KRT85]
GO:0030216	keratinocyte differentiation	GO_BiologicalProcess-EBI-UniProt-GOA_17.02.2020_00h00	5.258e-20	8.41279e-19	5.81657e-17	2.90829e-16	[5, 6, 7]	Group3	4.93421	15	[KRT1, KRT14, KRT15, KRT20, KRT24, KRT27, KRT28, KRT38, KRT39, KRT4, KRT40, KRT71, KRT72, KRT79, KRT85]
GO:0070268	cornification	GO_BiologicalProcess-EBI-UniProt-GOA_17.02.2020_00h00	4.45345e-26	8.9069e-25	5.81657e-17	2.90829e-16	[3, 4, 7, 8, 9]	Group3	12.1951	15	[KRT1, KRT14, KRT15, KRT20, KRT24, KRT27, KRT28, KRT38, KRT39, KRT4, KRT40, KRT71, KRT72, KRT79, KRT85]
GO:0005882	intermediate filament	GO_CellularComponent-EBI-UniProt-GOA_17.02.2020_00h00	1.11609e-21	2.12057e-20	5.81657e-17	2.90829e-16	[6, 7]	Group3	6.35593	15	[KRT1, KRT14, KRT15, KRT20, KRT24, KRT27, KRT28, KRT38, KRT39, KRT4, KRT40, KRT71, KRT72, KRT79, KRT85]
GO:1900046	regulation of hemostasis	GO_BiologicalProcess-EBI-UniProt-GOA_17.02.2020_00h00	1.0542e-06	7.37937e-06	1.08674e-05	3.26021e-05	[3, 4]	Group4	4.06504	5	[APOH, F2, FGB, KRT1, VTN]
GO:0072376	protein activation cascade	GO_BiologicalProcess-EBI-UniProt-GOA_17.02.2020_00h00	1.80033e-05	7.20132e-05	1.08674e-05	3.26021e-05	[2, 4, 5]	Group4	8.82353	3	[APOH, F2, FGB]
GO:0072378	blood coagulation, fibrin clot formation	GO_BiologicalProcess-EBI-UniProt-GOA_17.02.2020_00h00	1.80033e-05	7.20132e-05	1.08674e-05	3.26021e-05	[3, 4, 5, 6]	Group4	8.82353	3	[APOH, F2, FGB]
GO:1900047	negative regulation of hemostasis	GO_BiologicalProcess-EBI-UniProt-GOA_17.02.2020_00h00	3.09786e-08	3.71743e-07	1.08674e-05	3.26021e-05	[4, 5]	Group4	8.19672	5	[APOH, F2, FGB, KRT1, VTN]
GO:0050819	negative regulation of coagulation	GO_BiologicalProcess-EBI-UniProt-GOA_17.02.2020_00h00	4.28309e-08	4.7114e-07	1.08674e-05	3.26021e-05	[5]	Group4	7.69231	5	[APOH, F2, FGB, KRT1, VTN]
GO:0030193	regulation of blood coagulation	GO_BiologicalProcess-EBI-UniProt-GOA_17.02.2020_00h00	1.01241e-06	8.09924e-06	1.08674e-05	3.26021e-05	[4, 5, 7]	Group4	4.09836	5	[APOH, F2, FGB, KRT1, VTN]
GO:1903035	negative regulation of response to wounding	GO_BiologicalProcess-EBI-UniProt-GOA_17.02.2020_00h00	7.23047e-07	6.50742e-06	1.08674e-05	3.26021e-05	[5, 6]	Group4	4.38596	5	[APOH, F2, FGB, KRT1, VTN]
GO:0030195	negative regulation of blood coagulation	GO_BiologicalProcess-EBI-UniProt-GOA_17.02.2020_00h00	2.84693e-08	3.701e-07	1.08674e-05	3.26021e-05	[5, 6, 7, 8]	Group4	8.33333	5	[APOH, F2, FGB, KRT1, VTN]
GO:0061045	negative regulation of wound healing	GO_BiologicalProcess-EBI-UniProt-GOA_17.02.2020_00h00	2.47874e-07	2.47874e-06	1.08674e-05	3.26021e-05	[6, 7]	Group4	5.43478	5	[APOH, F2, FGB, KRT1, VTN]
GO:0042730	fibrinolysis	GO_BiologicalProcess-EBI-UniProt-GOA_17.02.2020_00h00	6.15172e-06	3.69103e-05	1.08674e-05	3.26021e-05	[6, 7, 8, 9]	Group4	12.5	3	[F2, FGB, KRT1]

## Sheet: KEGG analysis in module 1
Table S8-3. KEGG enrichment analysis in module 1 by ClueGo	KEGGTerm	Ontology Source	Term PValue	Term PValue Corrected with Bonferroni step down	Group PValue	Group PValue Corrected with Bonferroni step down	GOLevels	GOGroups	% Associated Genes	Nr. Genes	Associated Genes Found
KEGGID	KEGGTerm	Ontology Source	Term PValue	Term PValue Corrected with Bonferroni step down	Group PValue	Group PValue Corrected with Bonferroni step down	KEGGLevels	KEGGGroups	% Associated Genes	Nr. Genes	Associated Genes Found
KEGG:05143	African trypanosomiasis	KEGG_17.02.2020	0.000411746	0.00123524	0.000411746	0.000823493	[-1]	Group0	8.10811	3	[APOA1, APOL1, IL6]
KEGG:04610	Complement and coagulation cascades	KEGG_17.02.2020	0.000340054	0.00136022	0.000340054	0.00102016	[-1]	Group1	4.70588	4	[FGA, FGG, SERPINA1, SERPIND1]
KEGG:04979	Cholesterol metabolism	KEGG_17.02.2020	0.00100264	0.00200527	0.00100264	0.00100264	[-1]	Group2	6	3	[APOA1, APOA2, APOB]
KEGG:04060	Cytokine-cytokine receptor interaction	KEGG_17.02.2020	3.17612e-11	3.49373e-10	1.38612e-07	5.54447e-07	[-1]	Group3	4.42177	13	[BMP4, CCL20, CCL21, CXCL11, CXCL12, CXCL13, CXCL2, CXCL3, CXCL5, CXCL6, CXCL8, IL6, PF4]
KEGG:04061	Viral protein interaction with cytokine and cytokine receptor	KEGG_17.02.2020	1.35659e-15	1.76357e-14	1.38612e-07	5.54447e-07	[-1]	Group3	12	12	[CCL20, CCL21, CXCL11, CXCL12, CXCL13, CXCL2, CXCL3, CXCL5, CXCL6, CXCL8, IL6, PF4]
KEGG:04062	Chemokine signaling pathway	KEGG_17.02.2020	3.18283e-12	3.81939e-11	1.38612e-07	5.54447e-07	[-1]	Group3	6.34921	12	[CCL20, CCL21, CXCL11, CXCL12, CXCL13, CXCL2, CXCL3, CXCL5, CXCL6, CXCL8, GNG13, PF4]
KEGG:04064	NF-kappa B signaling pathway	KEGG_17.02.2020	4.67483e-05	0.000327238	1.38612e-07	5.54447e-07	[-1]	Group3	4.90196	5	[CCL21, CXCL12, CXCL2, CXCL3, CXCL8]
KEGG:04657	IL-17 signaling pathway	KEGG_17.02.2020	6.53053e-08	5.87748e-07	1.38612e-07	5.54447e-07	[-1]	Group3	7.44681	7	[CCL20, CXCL2, CXCL3, CXCL5, CXCL6, CXCL8, IL6]
KEGG:04668	TNF signaling pathway	KEGG_17.02.2020	4.43099e-06	3.54479e-05	1.38612e-07	5.54447e-07	[-1]	Group3	5.35714	6	[CCL20, CXCL2, CXCL3, CXCL5, CXCL6, IL6]
KEGG:05120	Epithelial cell signaling in Helicobacter pylori infection	KEGG_17.02.2020	0.0026525	0.0026525	1.38612e-07	5.54447e-07	[-1]	Group3	4.28571	3	[CXCL2, CXCL3, CXCL8]
KEGG:05133	Pertussis	KEGG_17.02.2020	0.000220972	0.00110486	1.38612e-07	5.54447e-07	[-1]	Group3	5.26316	4	[CXCL5, CXCL6, CXCL8, IL6]
KEGG:05134	Legionellosis	KEGG_17.02.2020	7.17544e-05	0.000430526	1.38612e-07	5.54447e-07	[-1]	Group3	7.01754	4	[CXCL2, CXCL3, CXCL8, IL6]
KEGG:05323	Rheumatoid arthritis	KEGG_17.02.2020	2.05481e-09	2.05481e-08	1.38612e-07	5.54447e-07	[-1]	Group3	8.60215	8	[CCL20, CXCL12, CXCL2, CXCL3, CXCL5, CXCL6, CXCL8, IL6]

## Sheet: KEGG analysis in module 2
Table S8-4. KEGG enrichment analysis in module 2 by ClueGo	GOTerm	Ontology Source	Term PValue	Term PValue Corrected with Bonferroni step down	Group PValue	Group PValue Corrected with Bonferroni step down	GOLevels	GOGroups	% Associated Genes	Nr. Genes	Associated Genes Found
KEGGID	KEGGTerm	Ontology Source	Term PValue	Term PValue Corrected with Bonferroni step down	Group PValue	Group PValue Corrected with Bonferroni step down	KEGGLevels	KEGGGroups	% Associated Genes	Nr. Genes	Associated Genes Found
KEGG:04657	IL-17 signaling pathway	KEGG_17.02.2020	9.1755e-05	9.1755e-05	9.1755e-05	9.1755e-05	[-1]	Group0	4.25532	4	[CCL17, CCL2, CSF3, MMP9]
KEGG:04915	Estrogen signaling pathway	KEGG_17.02.2020	5.03686e-13	1.51106e-12	2.70392e-11	5.40784e-11	[-1]	Group1	7.24638	10	[KRT14, KRT15, KRT20, KRT24, KRT27, KRT28, KRT38, KRT39, KRT40, MMP9]
KEGG:05150	Staphylococcus aureus infection	KEGG_17.02.2020	9.1862e-13	1.83724e-12	2.70392e-11	5.40784e-11	[-1]	Group1	9.375	9	[KRT14, KRT15, KRT20, KRT24, KRT27, KRT28, KRT38, KRT39, KRT40]
